# Supplementary material for: Cyclometalated iridium(iii) complexes of (aryl)ethenyl functionalized 2,2′-bipyridine: synthesis, photophysical properties and trans–cis isomerization behavior
Source: Royal Society of Chemistry journal article supplement (doi:10.1039/c5ra16214a), 2015-01-01
Supplement: c5ra16214a2.pdf [file c5ra16214a2.pdf]

## Supporting Information

### Cyclometalated iridium (III) complexes of (aryl)ethenyl functionalized 2, 2'-bipyridine: synthesis, photophysical properties and *trans-cis* isomerization behavior

Soumalya Sinha, Soumik Mandal, Parna Gupta\*

Department of Chemical Sciences,  
Indian Institute of Science Education and Research (IISER) Kolkata,  
Mohanpur, Nadia, 741246, India  
Email: parna@iiserkol.ac.in

#### Contents:

|                                                                                                                                                             |         |
|-------------------------------------------------------------------------------------------------------------------------------------------------------------|---------|
| 1. Time-dependent $^1\text{H}$ NMR spectra of <b>L2</b> under photoirradiation.....                                                                         | 2       |
| 2. Expanded $^1\text{H}$ NMR data of <b>L1</b> .....                                                                                                        | 2 – 4   |
| 3. Variable temperature $^1\text{H}$ NMR spectra of <b>L1</b> and <b>L2</b> .....                                                                           | 5 – 6   |
| 4. $^1\text{H}$ - $^1\text{H}$ COSY and $^1\text{H}$ - $^1\text{H}$ NOESY NMR spectra of <b>L1</b><br>(before and after photoirradiation).....              | 7 – 9   |
| 5. Time dependent absorption spectra of <b>L1</b> under photoirradiation .....                                                                              | 9       |
| 6. HPLC of complex for –<br>(A) <b>1</b> ( <i>trans, trans</i> ) and <b>2</b> ( <i>trans, trans</i> ) (B) <b>1</b> and <b>2</b> after photoirradiation..... | 10      |
| 7. $^1\text{H}$ - $^1\text{H}$ COSY and $^1\text{H}$ - $^1\text{H}$ NOESY NMR spectra of complex <b>1</b><br>(before and after photoirradiation).....       | 11 – 13 |
| 8. Expanded $^1\text{H}$ NMR of complex <b>1</b> and <b>2</b> .....                                                                                         | 14 – 21 |
| 9. Time-dependent $^1\text{H}$ NMR spectra of complex <b>2</b> .....                                                                                        | 21 – 22 |
| 10. $^{13}\text{C}$ NMR spectra of complexes <b>1</b> and <b>2</b> .....                                                                                    | 23      |
| 11. Temperature dependent $^1\text{H}$ NMR of <b>1</b> and <b>2</b> methanol- $d_4$ .....                                                                   | 24      |
| 12. Time dependent electronic spectra of complex <b>2</b> under photoirradiation .....                                                                      | 25      |
| 13. Energy levels of the ground and excited states for <b>L1</b> , <b>L2</b> and complexes <b>1</b> , <b>2</b> .....                                        | 26      |
| 14. ESI-MS of ligands <b>L1</b> and <b>L2</b> .....                                                                                                         | 27      |
| 15. ESI-MS of complexes <b>1</b> and <b>2</b> .....                                                                                                         | 28      |
| 16. Table S1: Selected bond distances and bond angles for <b>1</b> , <b>2</b> and <b>2<sub>final</sub></b> .....                                            | 29      |

**Figure S1.** Time-dependent  $^1\text{H}$  NMR spectra of **L2** under photoirradiation

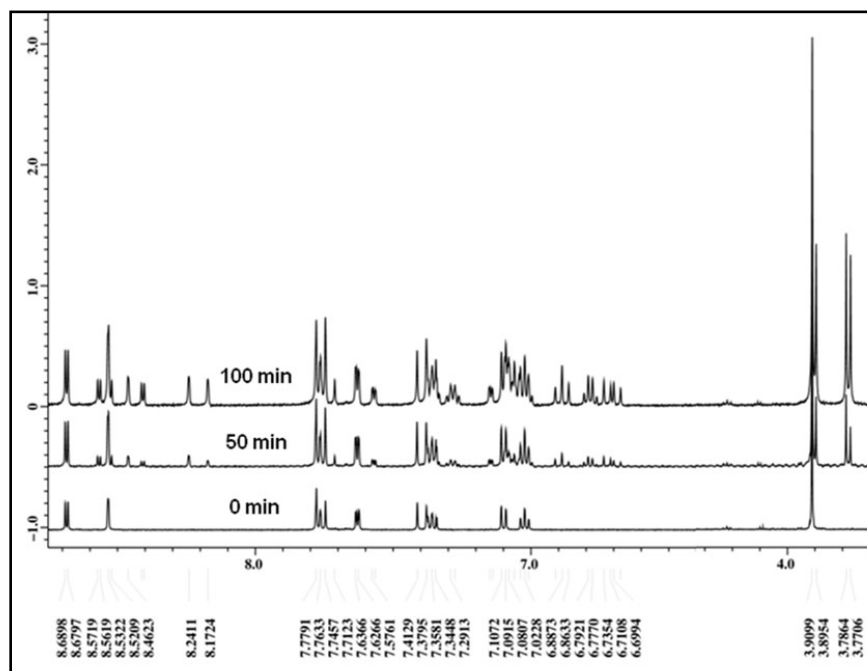

**Figure S2:** Expanded  $^1\text{H}$  NMR data of **L1**

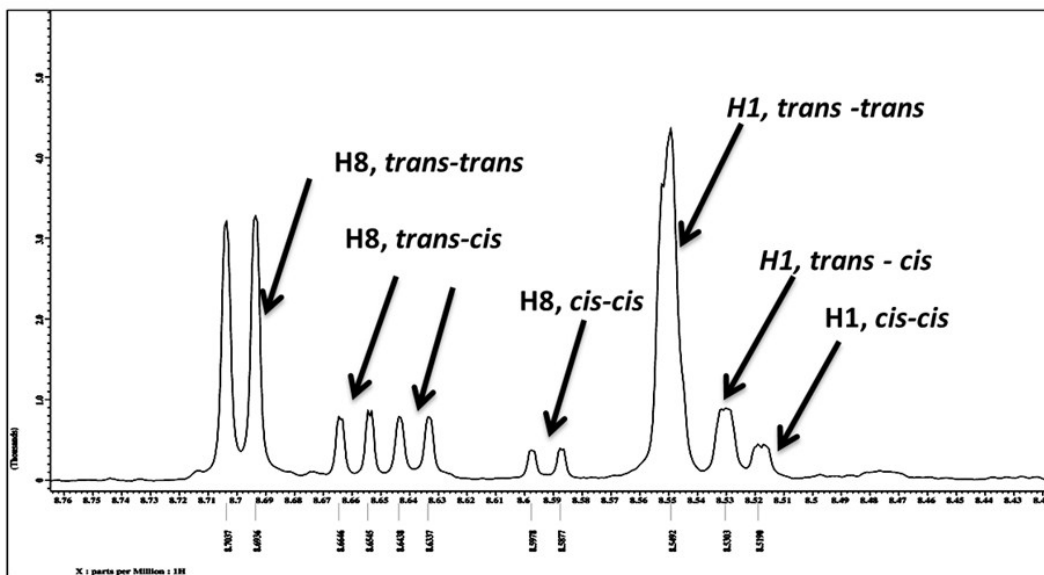

Note: H8, H1 (*tt*, *tc*, *cc*)

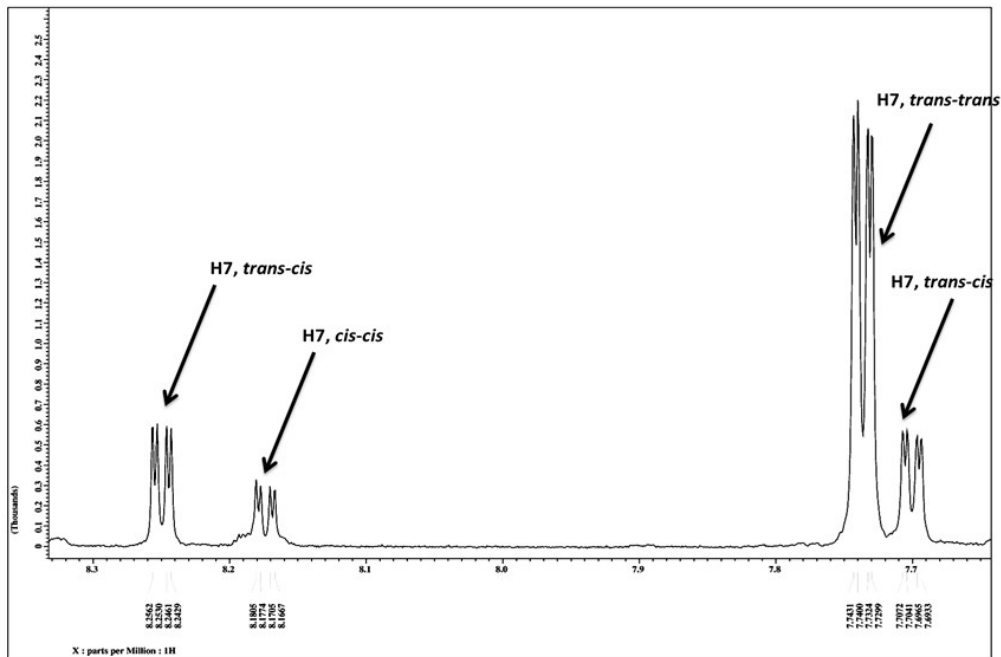

Note: H7(*tt*, *tc*, *cc*)

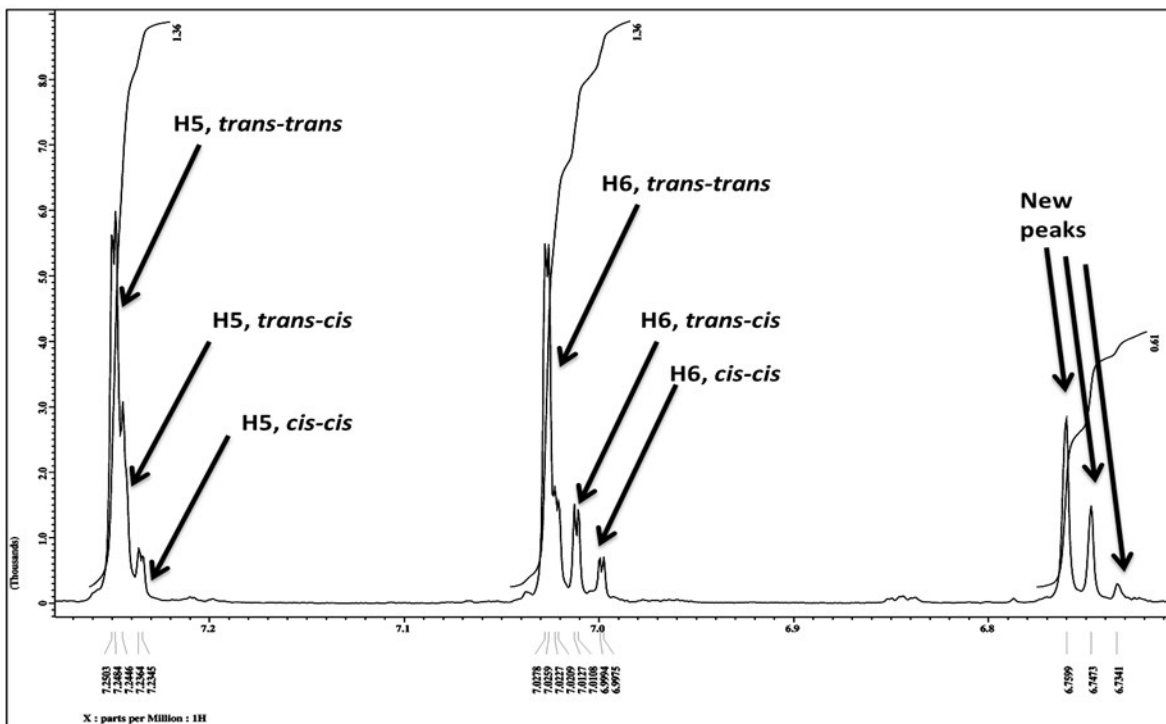

Note: H5(*tt*, *tc*, *cc*), H6(*tt*, *tc*, *cc*), H2-H3(*tc*, *cc*)

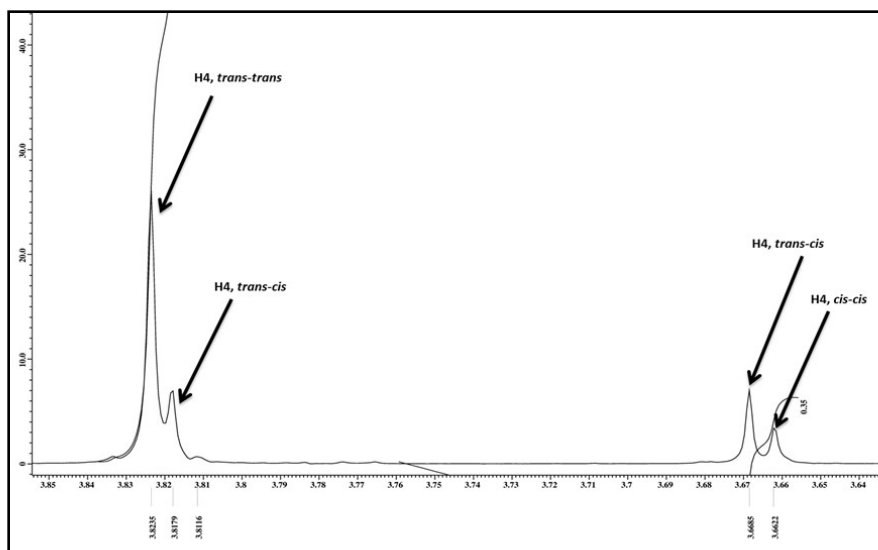

Note: H4(*tt*, *tc*, *cc*)

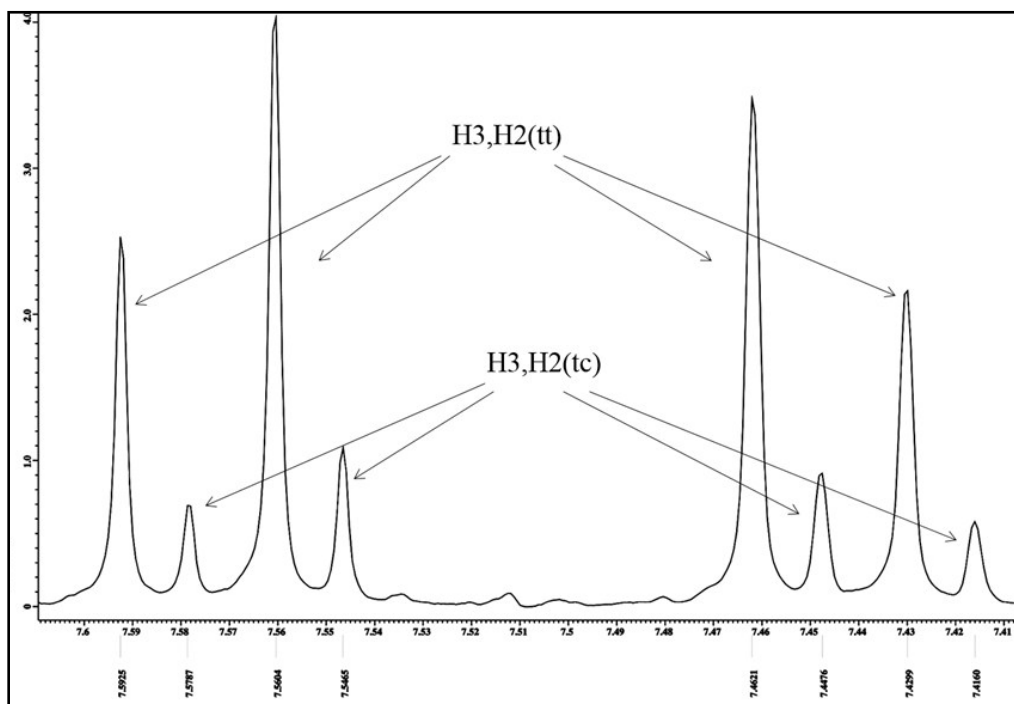

Note: H2-H3(*tt*, *tc*)

Figure S3: Variable temperature  $^1\text{H}$  NMR spectra in Methanol- $\text{d}_4$

L1:

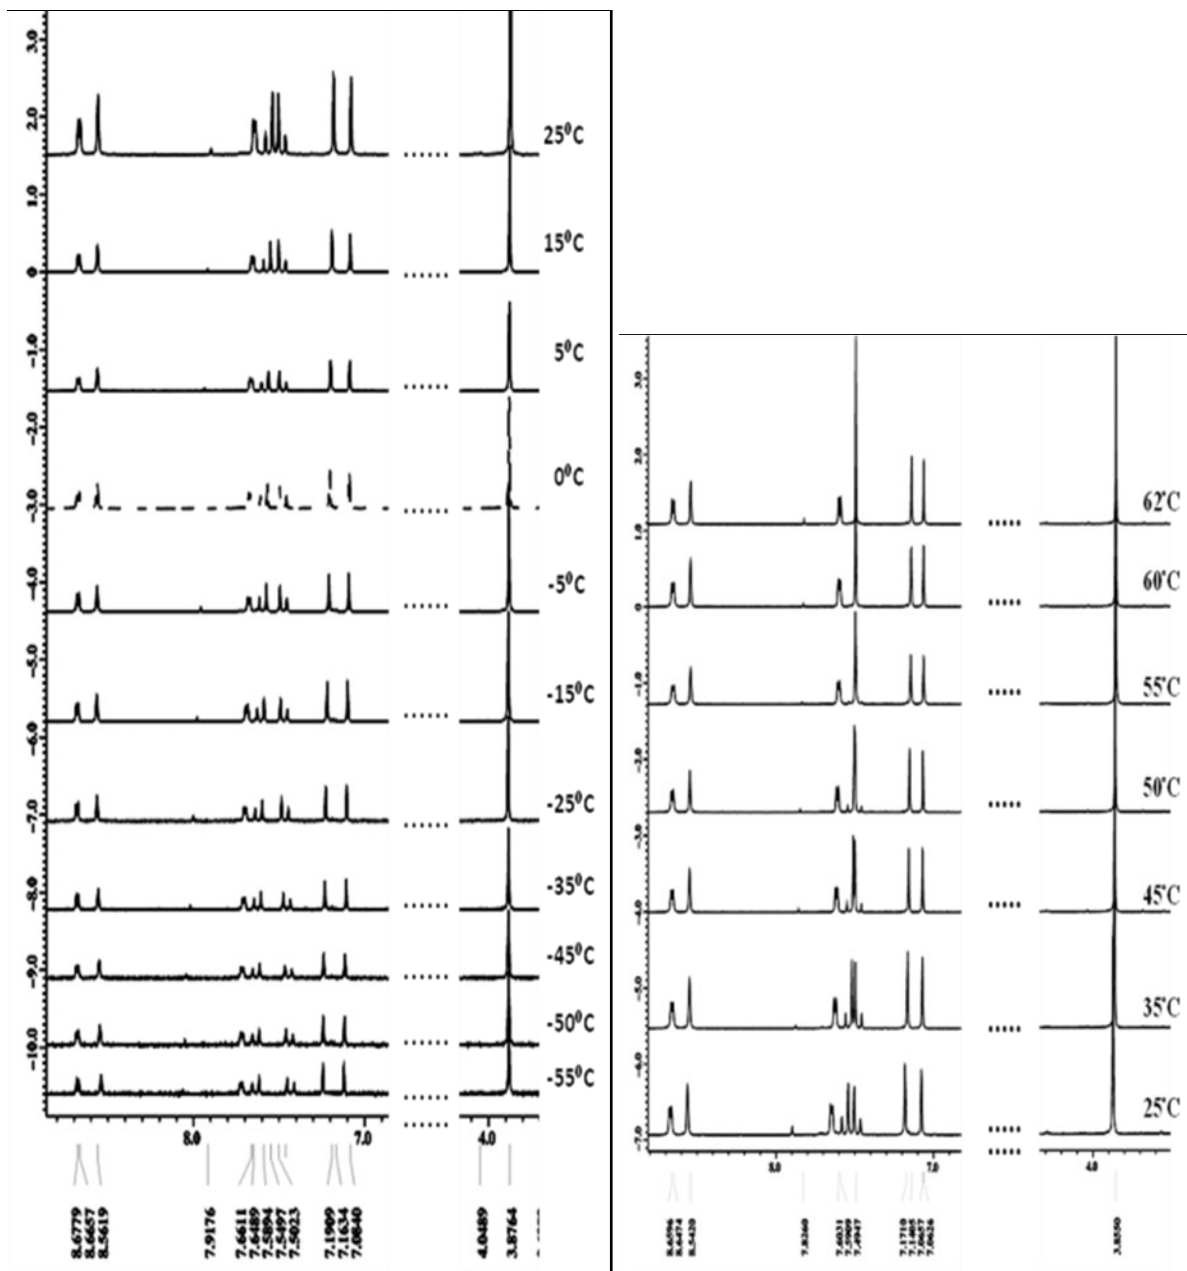

L2:

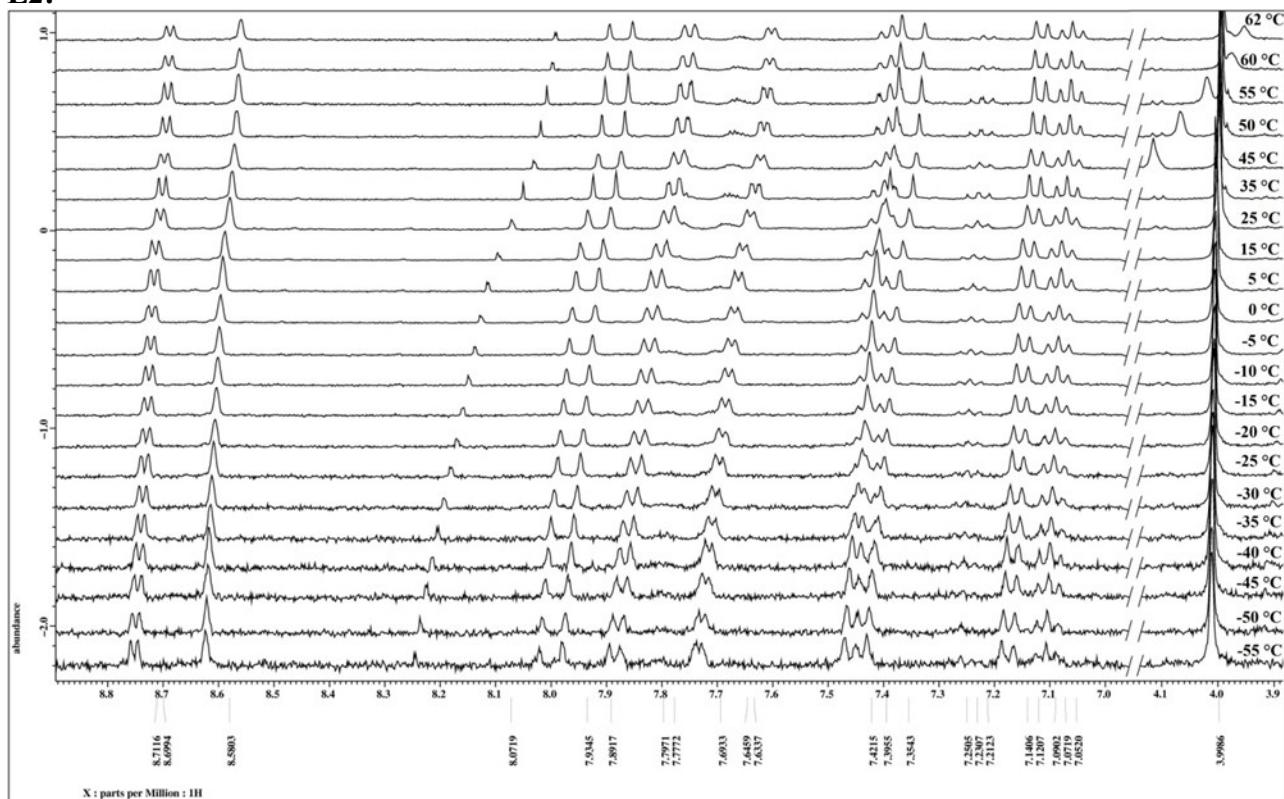

**Figure S4:  $^1\text{H}$  -  $^1\text{H}$  COSY and  $^1\text{H}$  -  $^1\text{H}$  NOESY NMR spectra of L1 Before photoirradiation:**

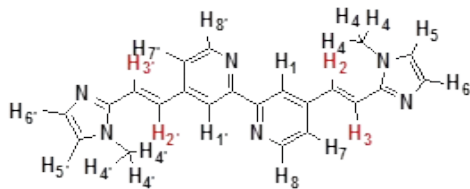

$^1\text{H}$  -  $^1\text{H}$  COSY NMR:

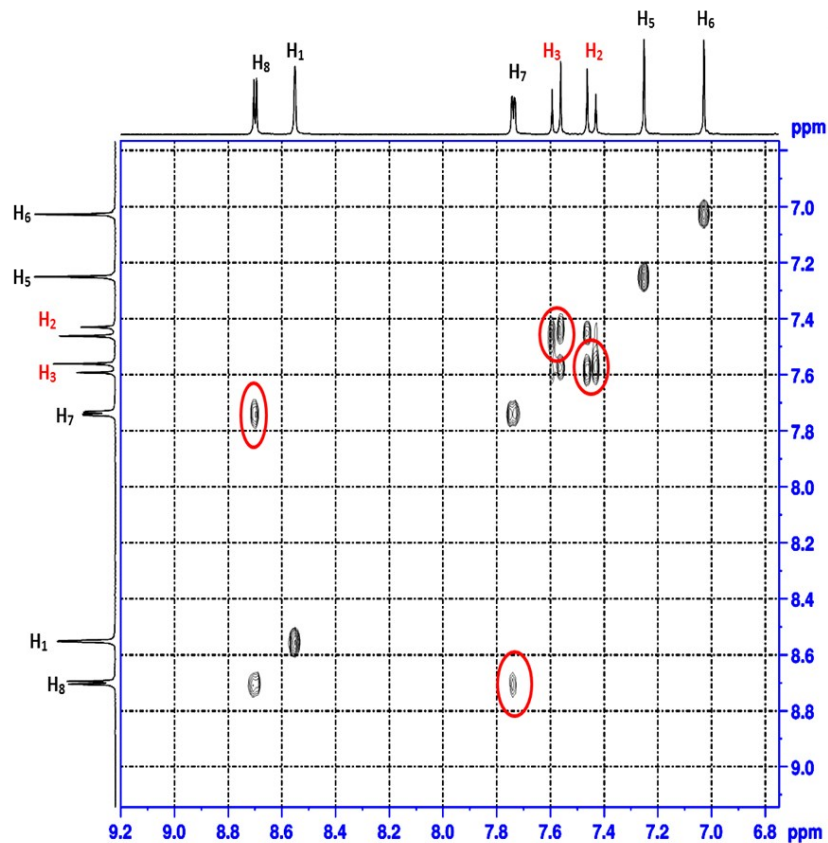

$^1\text{H} - ^1\text{H}$  NOESY NMR:

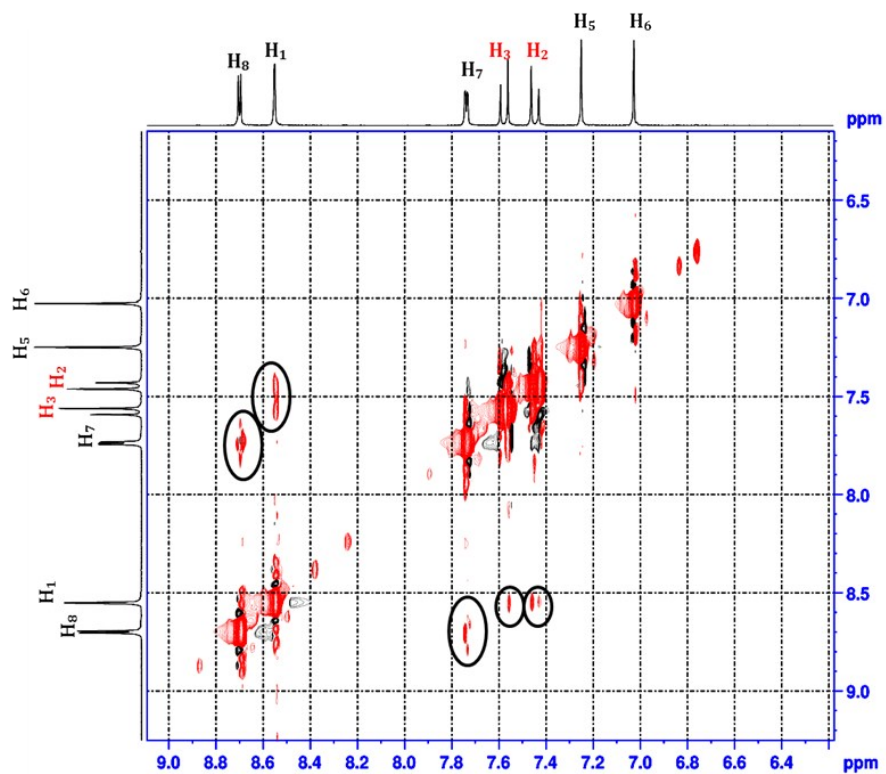

**After photoirradiation:**

$^1\text{H} - ^1\text{H}$  COSY NMR:

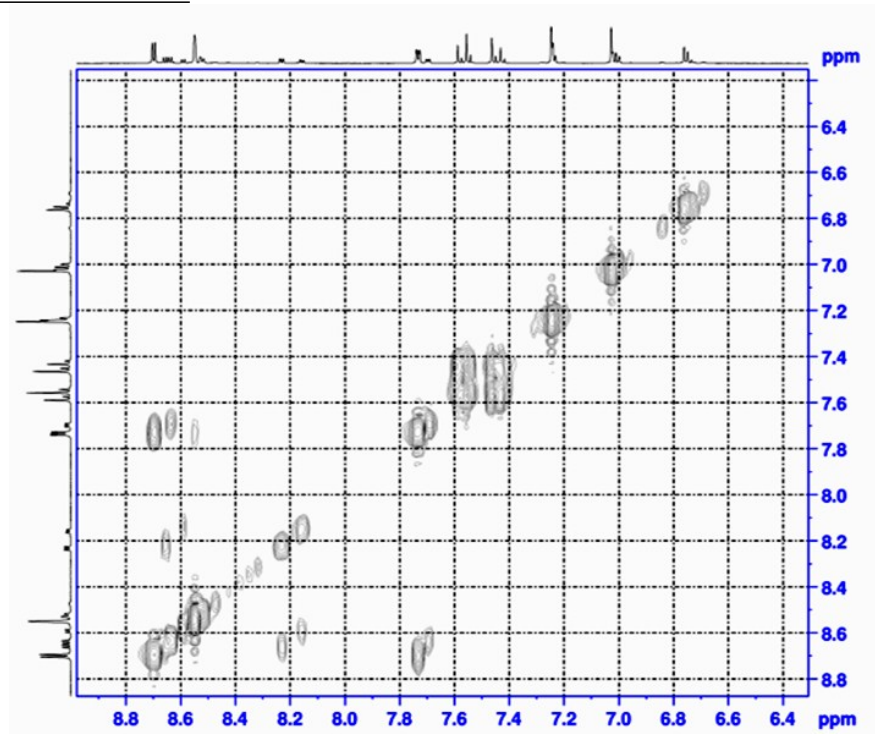



$^1\text{H} - ^1\text{H}$  NOESY NMR:

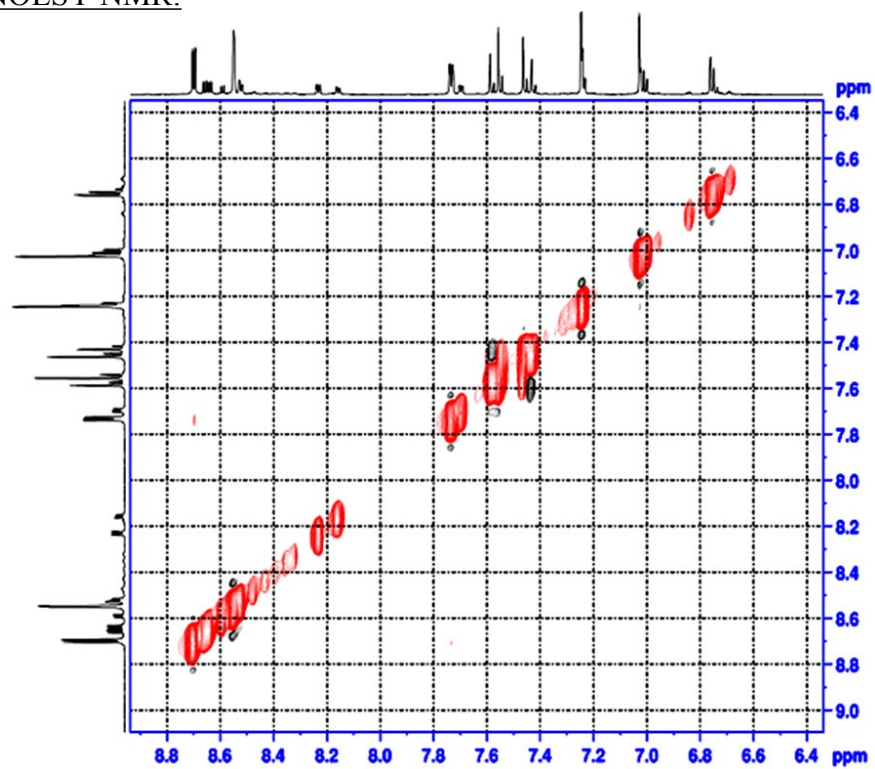

**Figure S5:** Time dependent absorption spectra of **L1** under photoirradiation

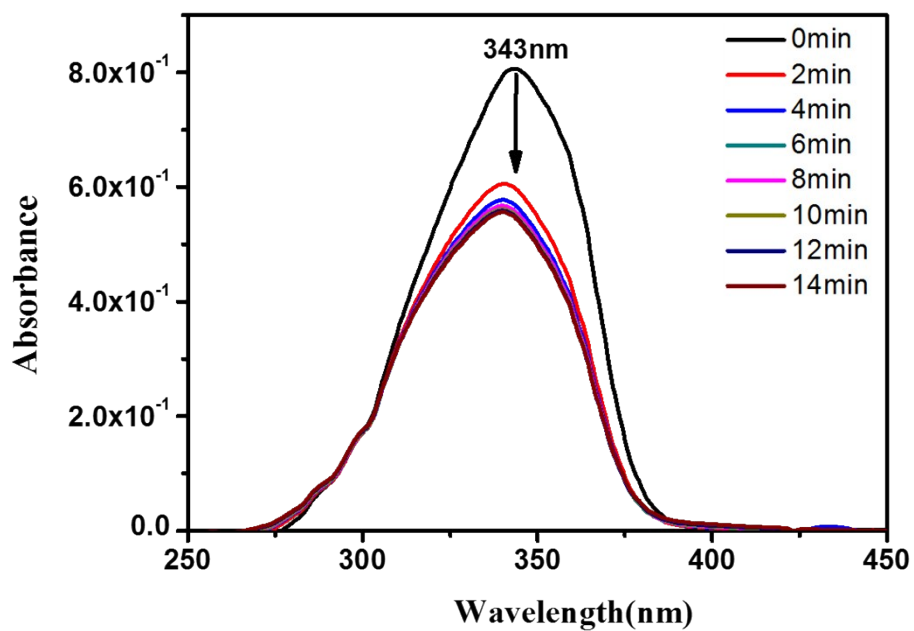

**Figure S6:** HPLC of complex for (A) **1** (*trans, trans*) and **2** (*trans, trans*) (B) **1** and **2** after photoirradiation

Retention Time

| Complex  | Retention Time (pure <i>trans-trans</i> ) (minutes) | Retention Time (After photoirradiation) |
|----------|-----------------------------------------------------|-----------------------------------------|
| <b>1</b> | 9.84                                                | 10.45                                   |
| <b>2</b> | 9.53, 10.01                                         | 10.39                                   |

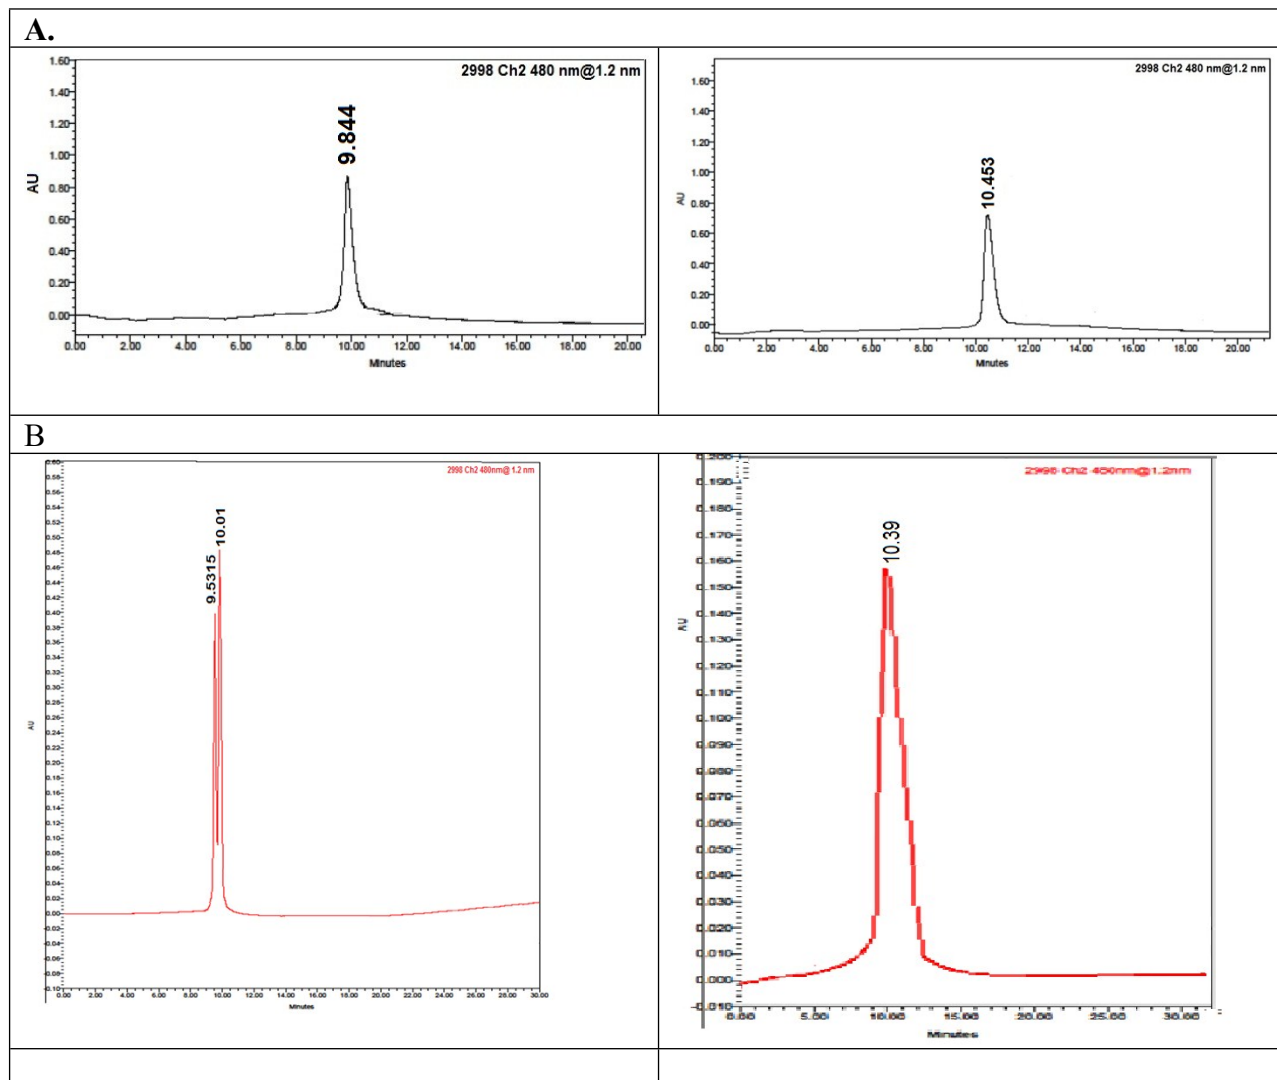

Figure S7:  $^1\text{H} - ^1\text{H}$  COSY and  $^1\text{H} - ^1\text{H}$  NOESY NMR spectra of Complex 1

A. Before photoirradiation:

$^1\text{H} - ^1\text{H}$  COSY NMR:

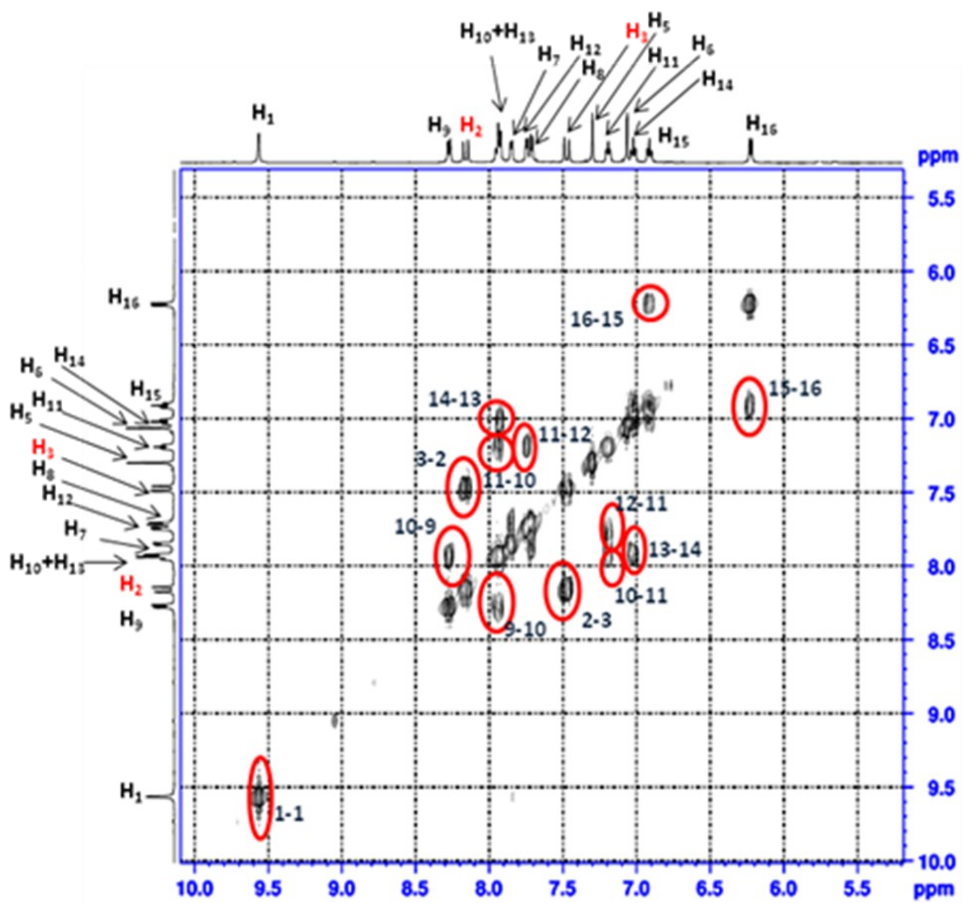

$^1\text{H} - ^1\text{H}$  NOESY NMR:

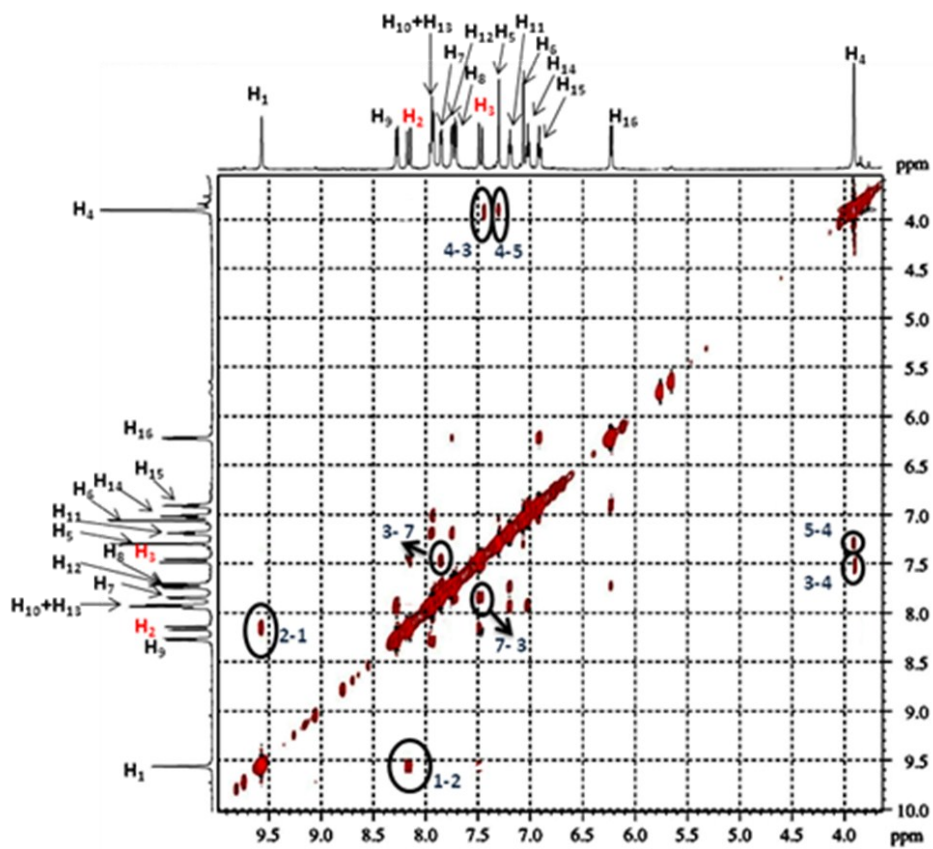

**B. After photoirradiation:**  
 $^1\text{H} - ^1\text{H}$  COSY NMR:

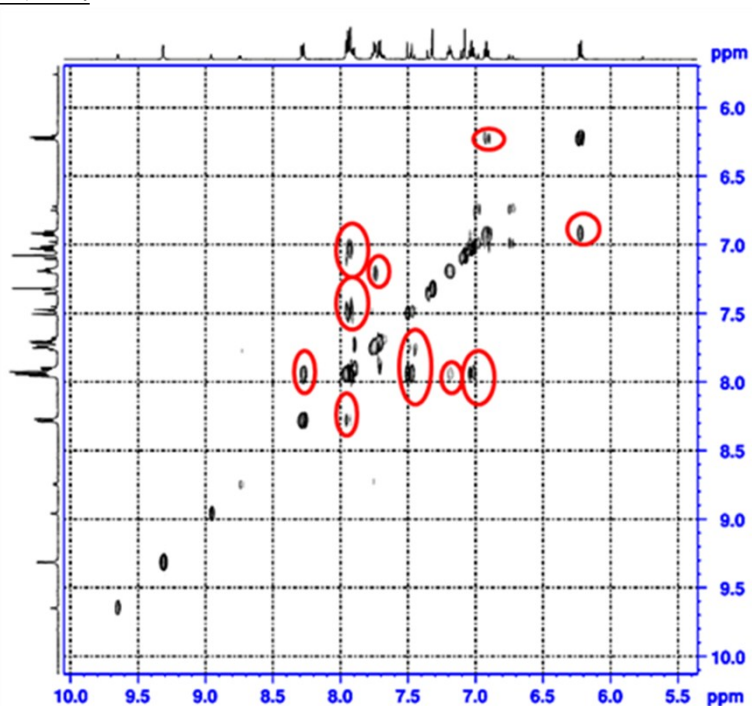

$^1\text{H} - ^1\text{H}$  NOESY NMR:

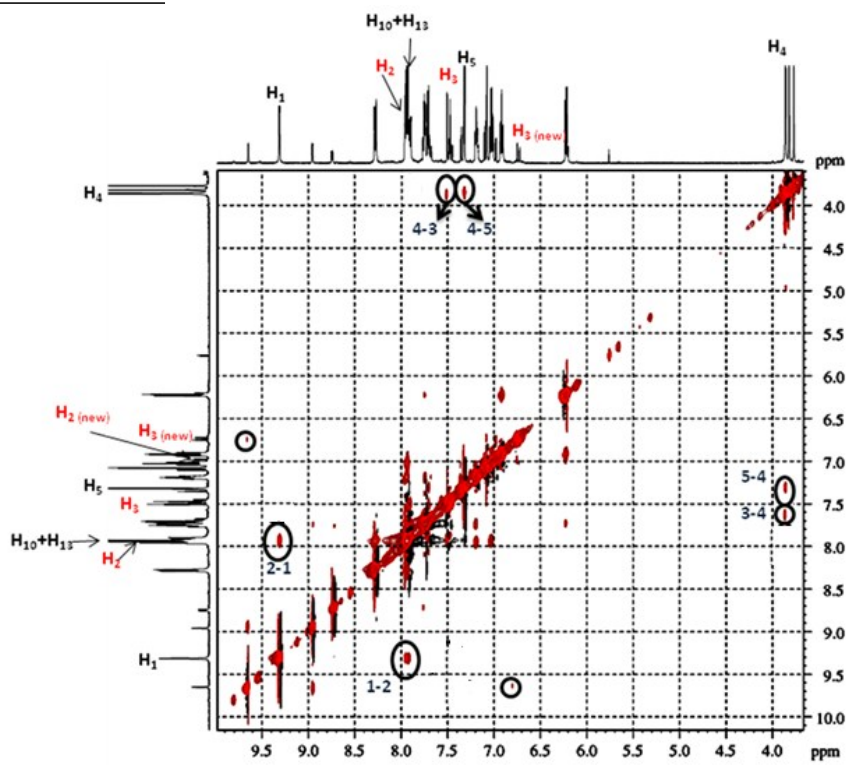

**Figure S8:** Expanded  $^1\text{H}$  NMR of complex **1**(*trans,trans*) and **2**(*trans,trans*) in  $\text{DMSO-d}_6$ .  
Complex **1**:

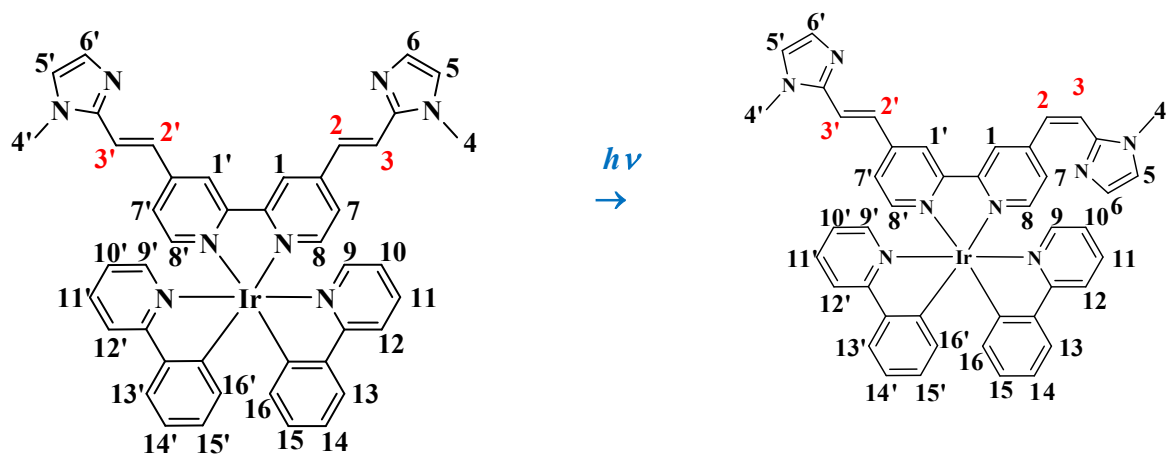

$^1\text{H}$  NMR spectrum of **1** (entire spectrum)

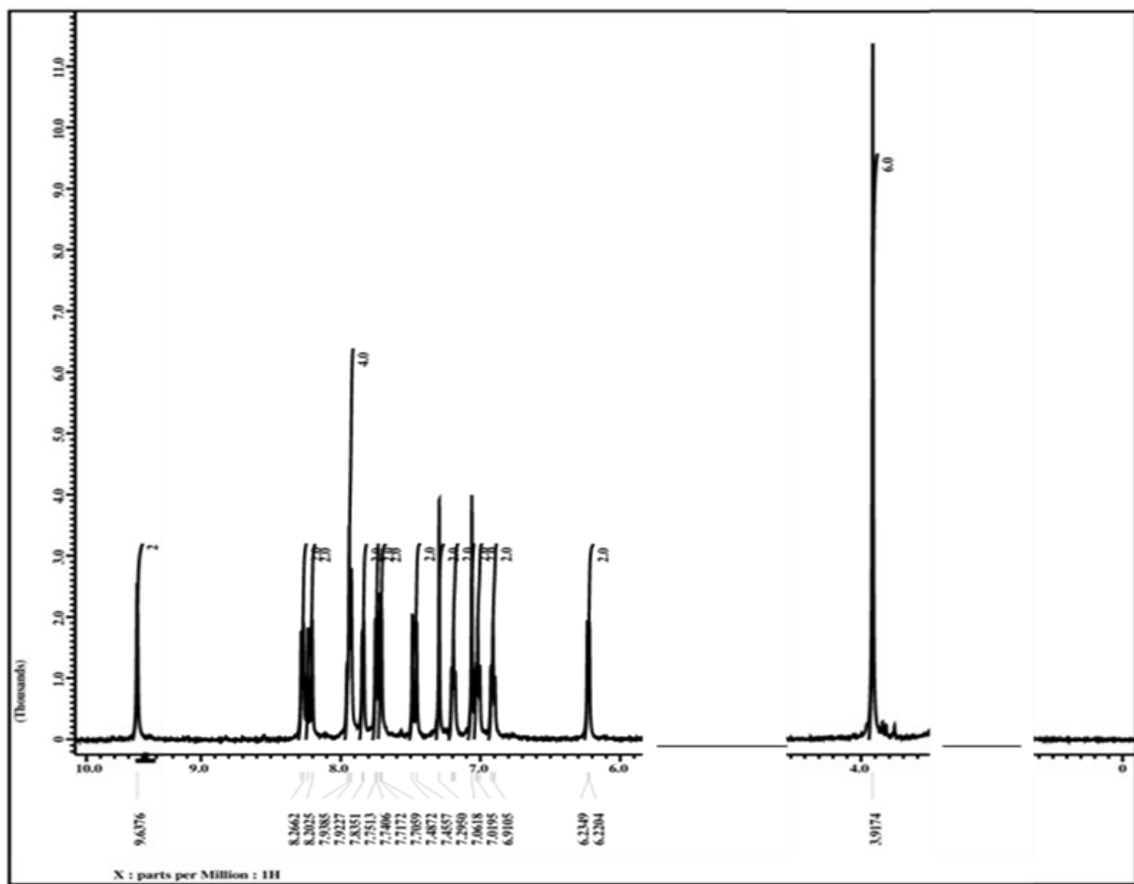

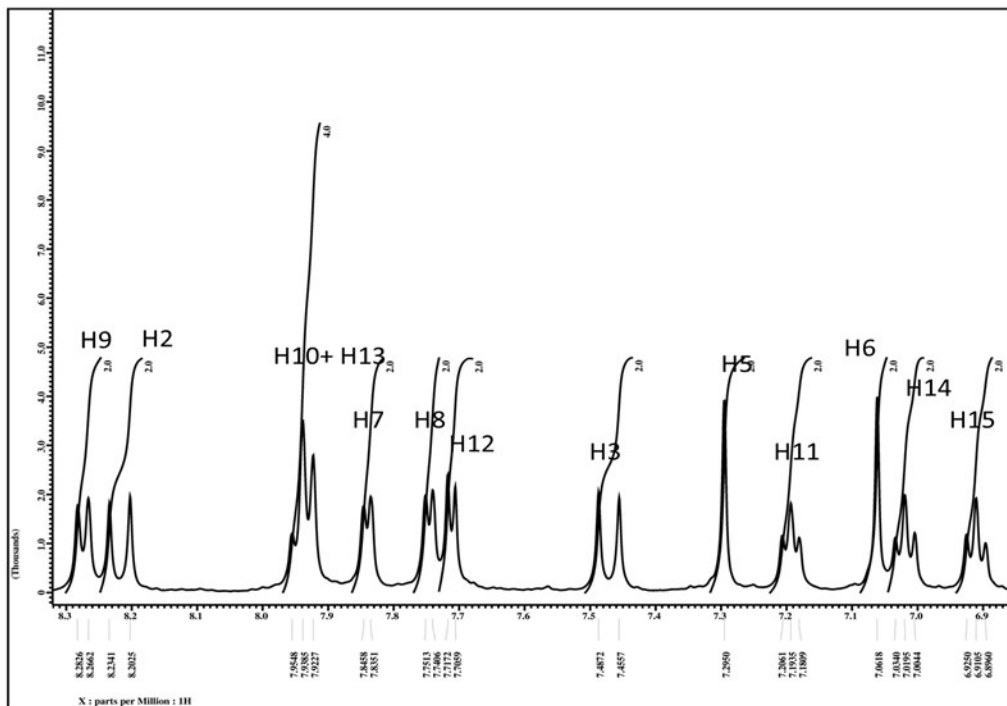

<sup>1</sup>H NMR spectrum of 1 (Part A)

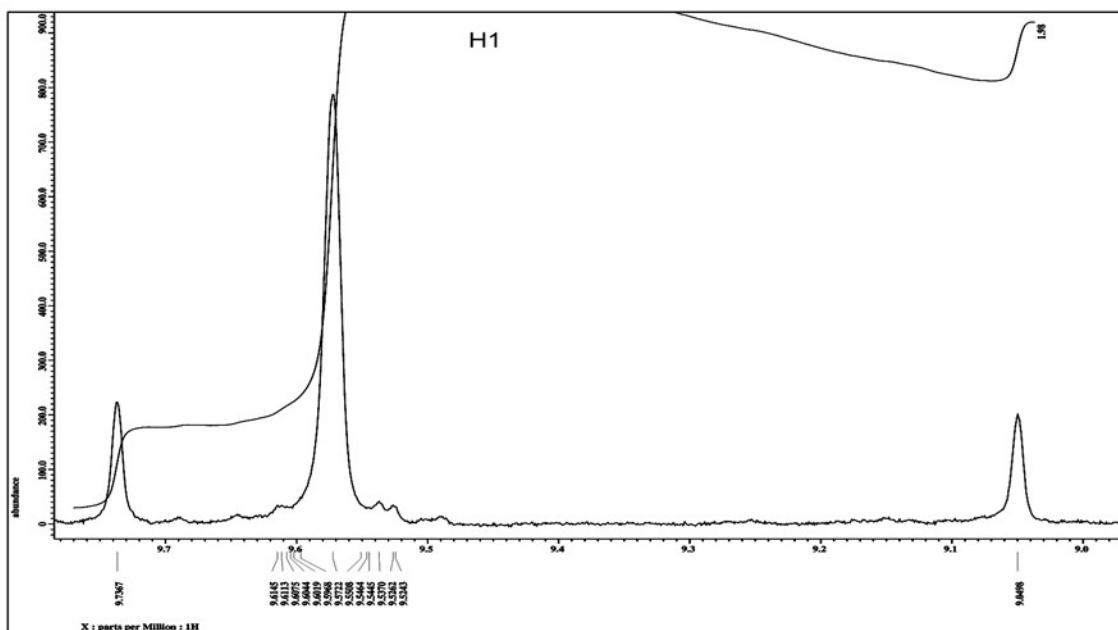

<sup>1</sup>H NMR spectrum of 1 (Part B)

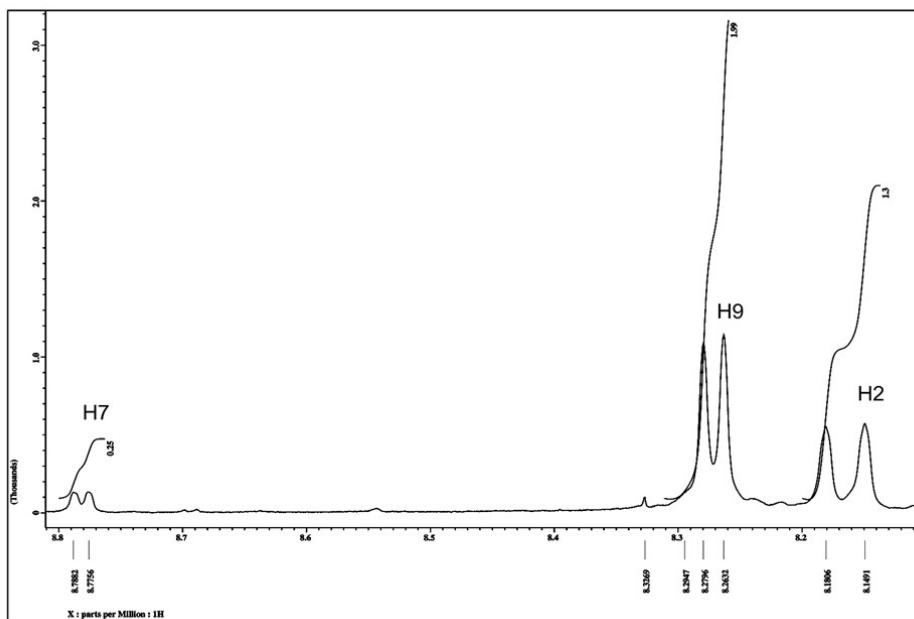

<sup>1</sup>H NMR spectrum of **1** (Part C)

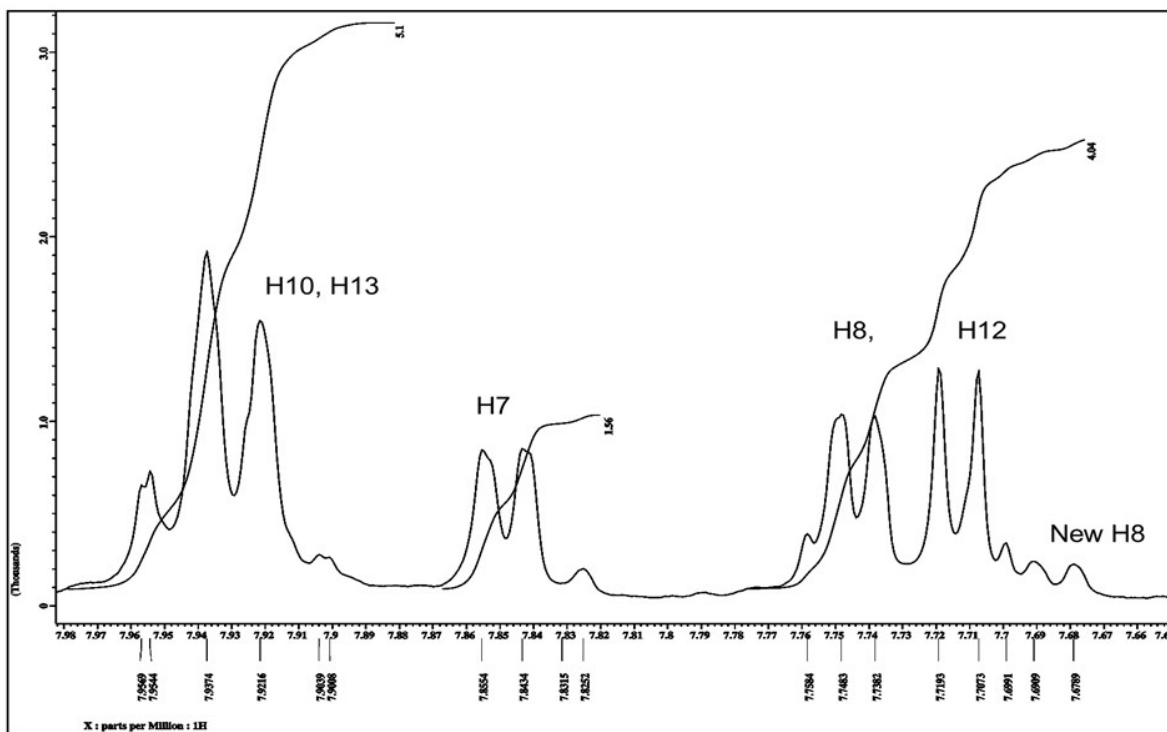

<sup>1</sup>H NMR spectrum of **1** (Part D)



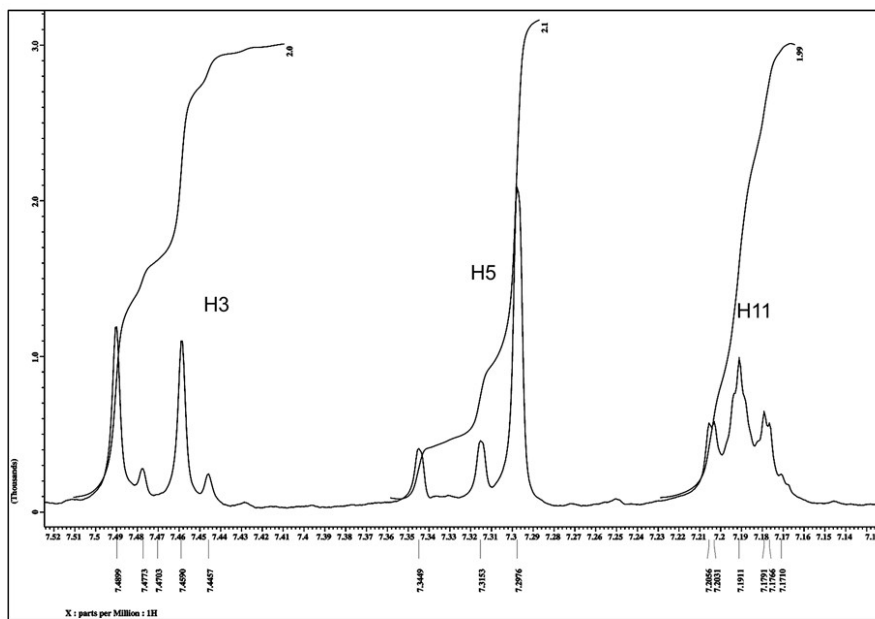

<sup>1</sup>H NMR spectrum of **1** (Part E)

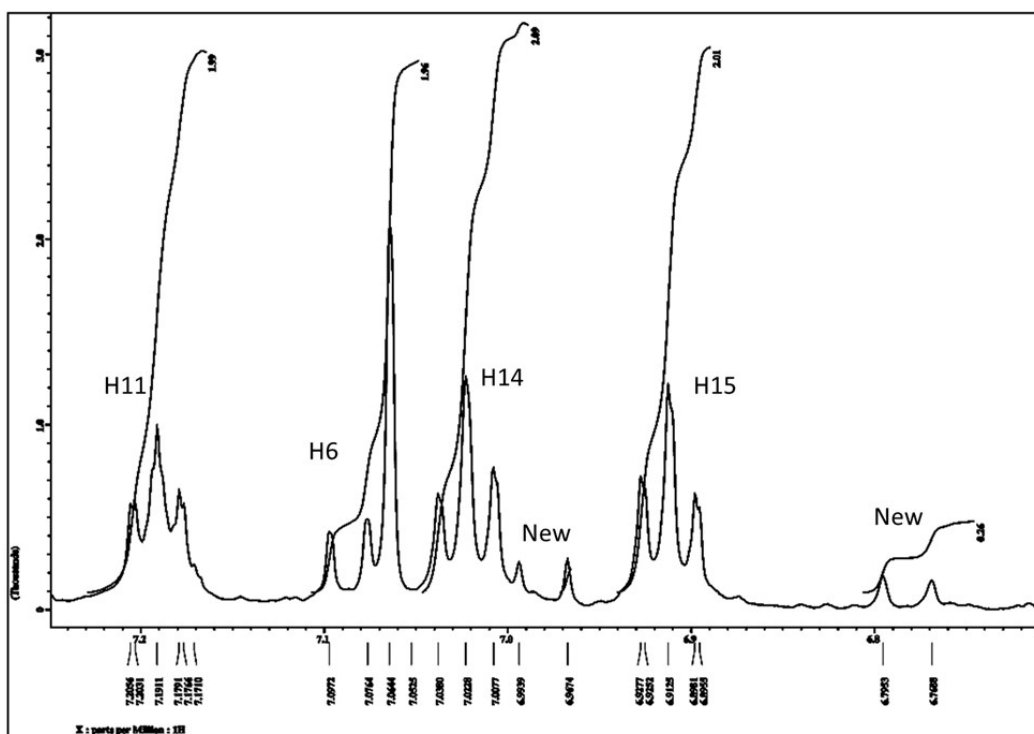

<sup>1</sup>H NMR spectrum of **1** (Part F)

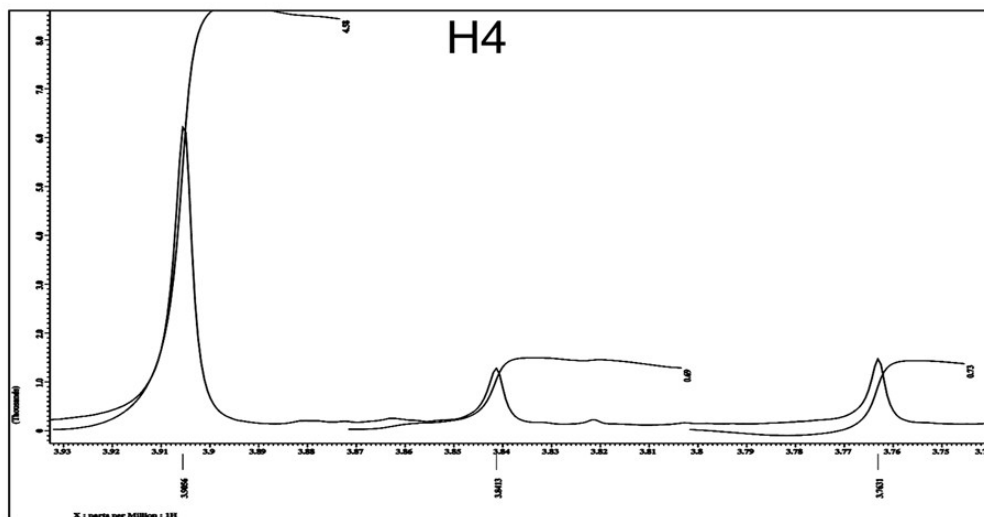

$^1\text{H}$  NMR spectrum of **1** (Part E)

Complex **2**:

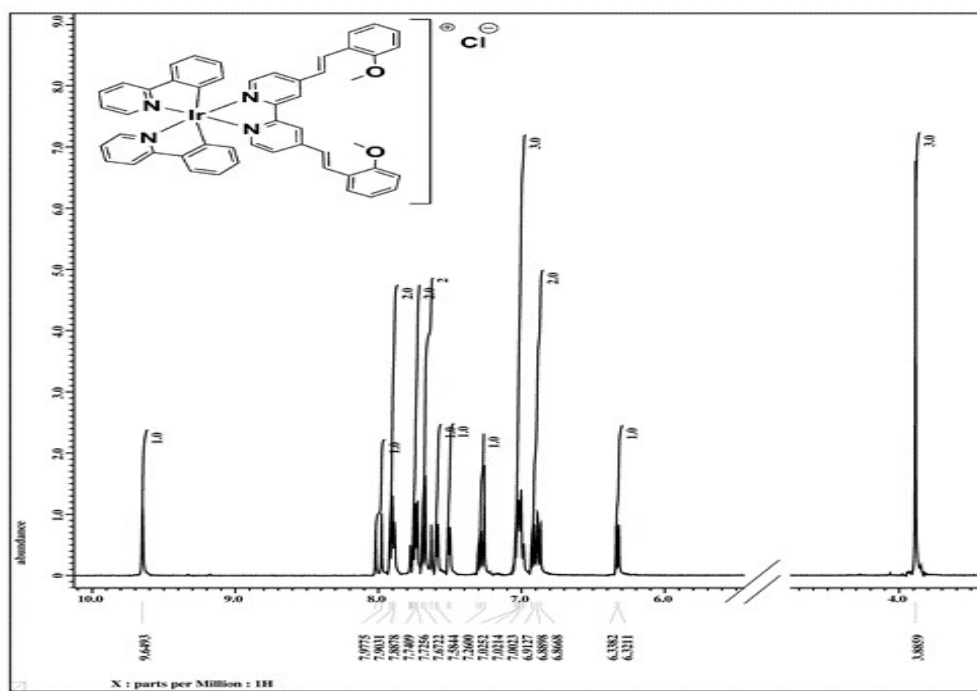

$^1\text{H}$  NMR spectrum of **2** (entire spectrum)

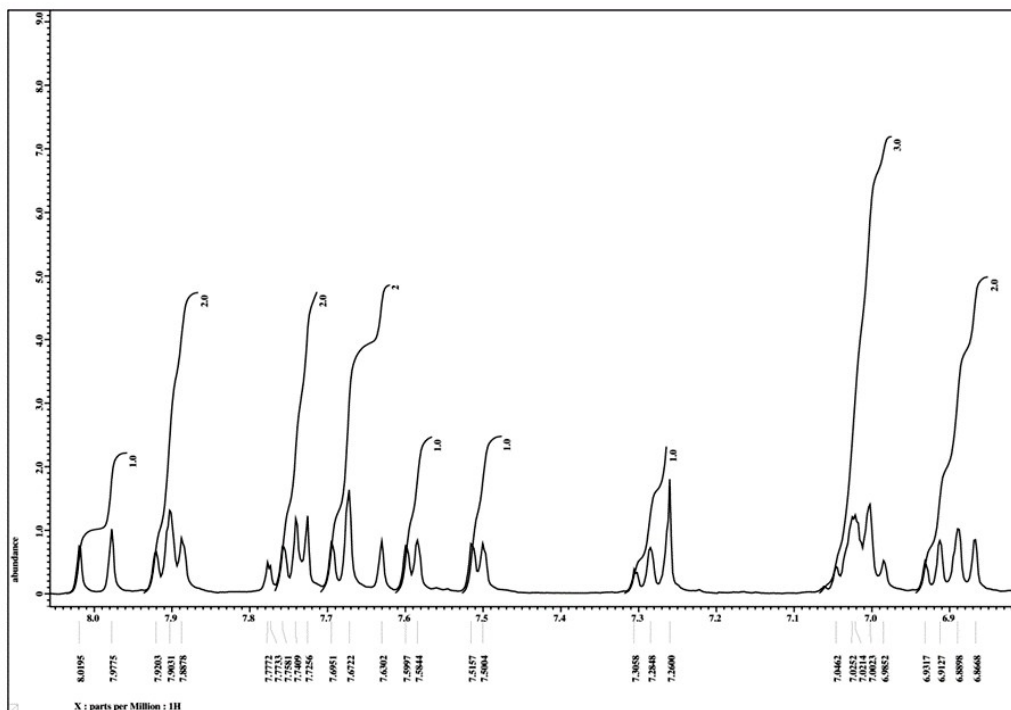

<sup>1</sup>H NMR spectrum of 2 (Part A)

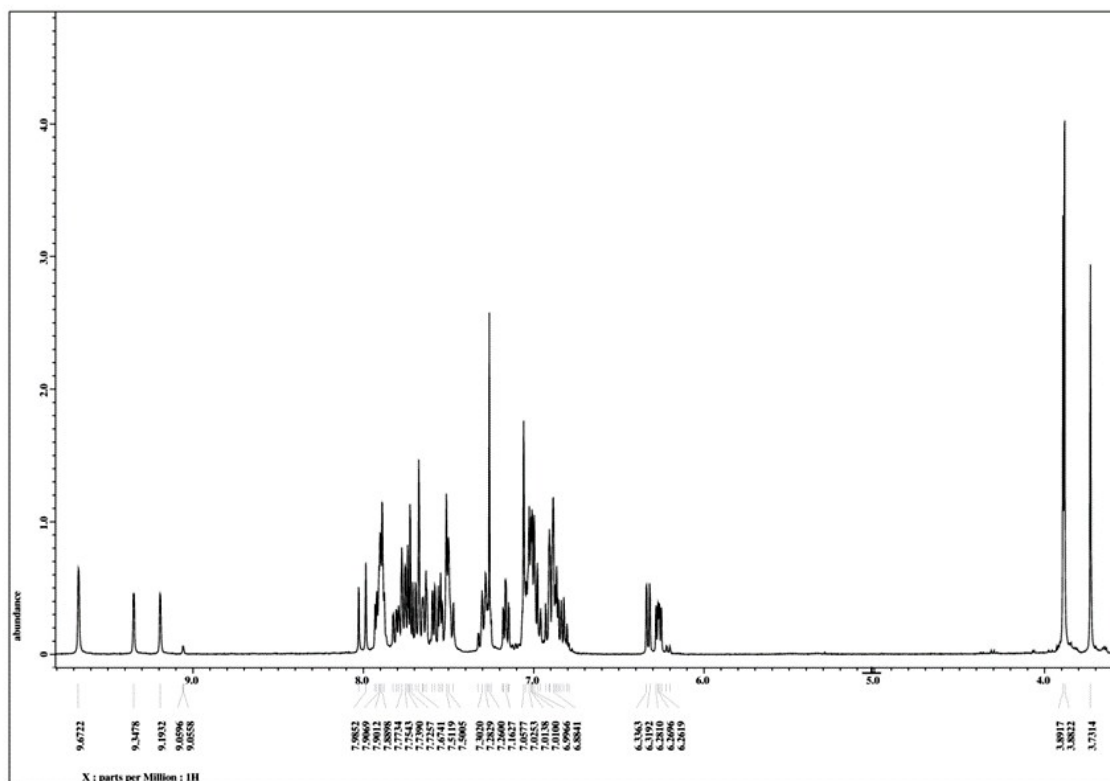

<sup>1</sup>H NMR spectrum of 2 (Part B)

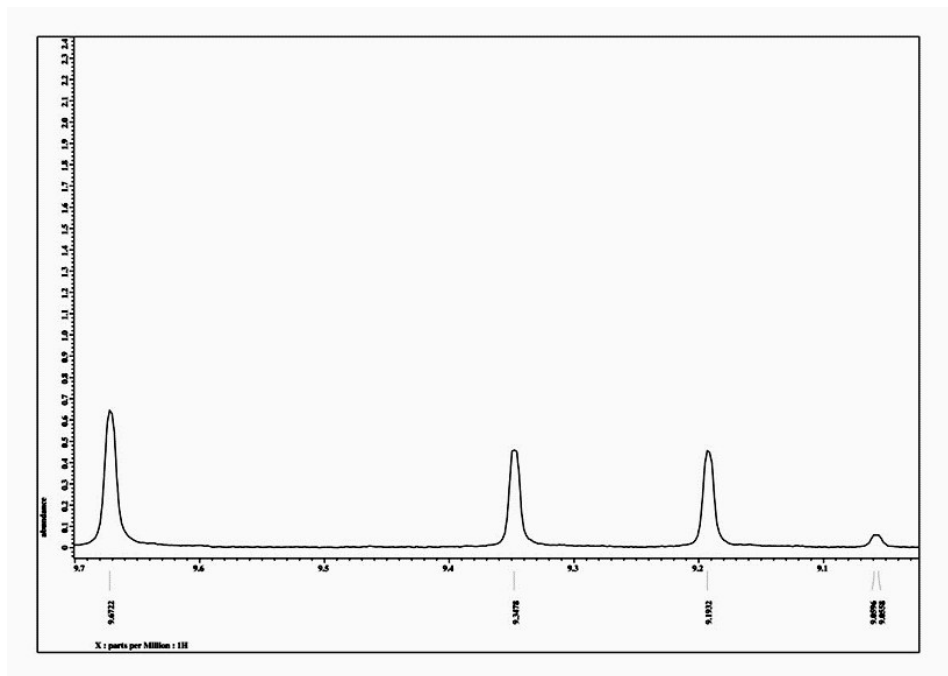

<sup>1</sup>H NMR spectrum of **2** (Part C)

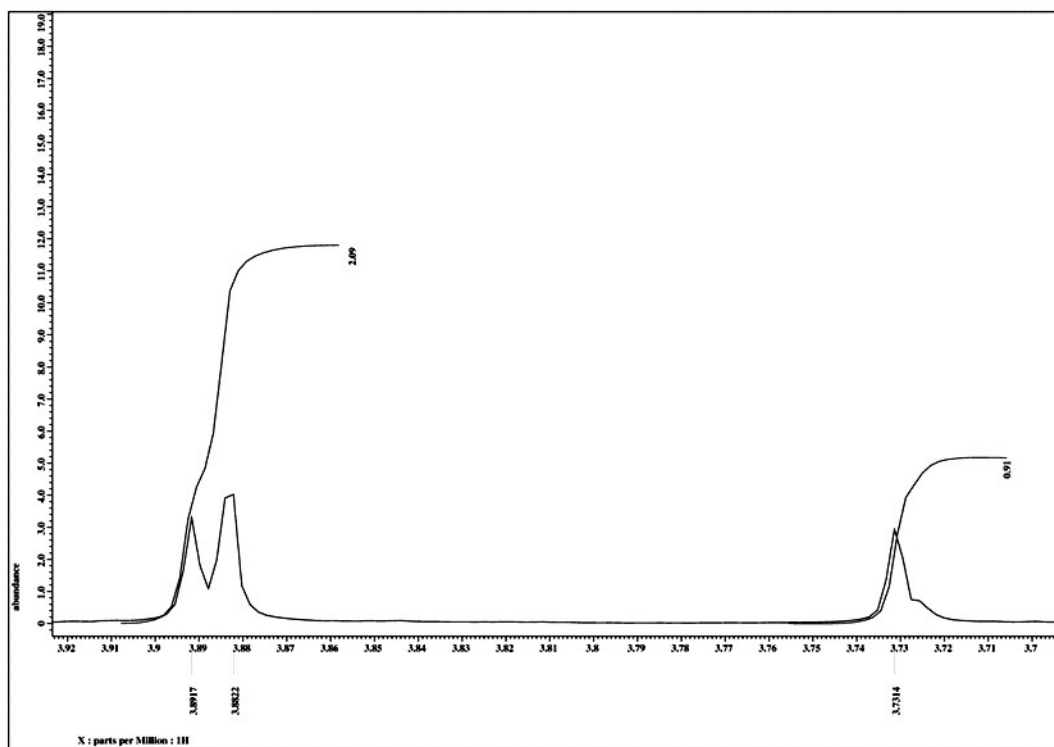

<sup>1</sup>H NMR spectrum of **2** (Part D)



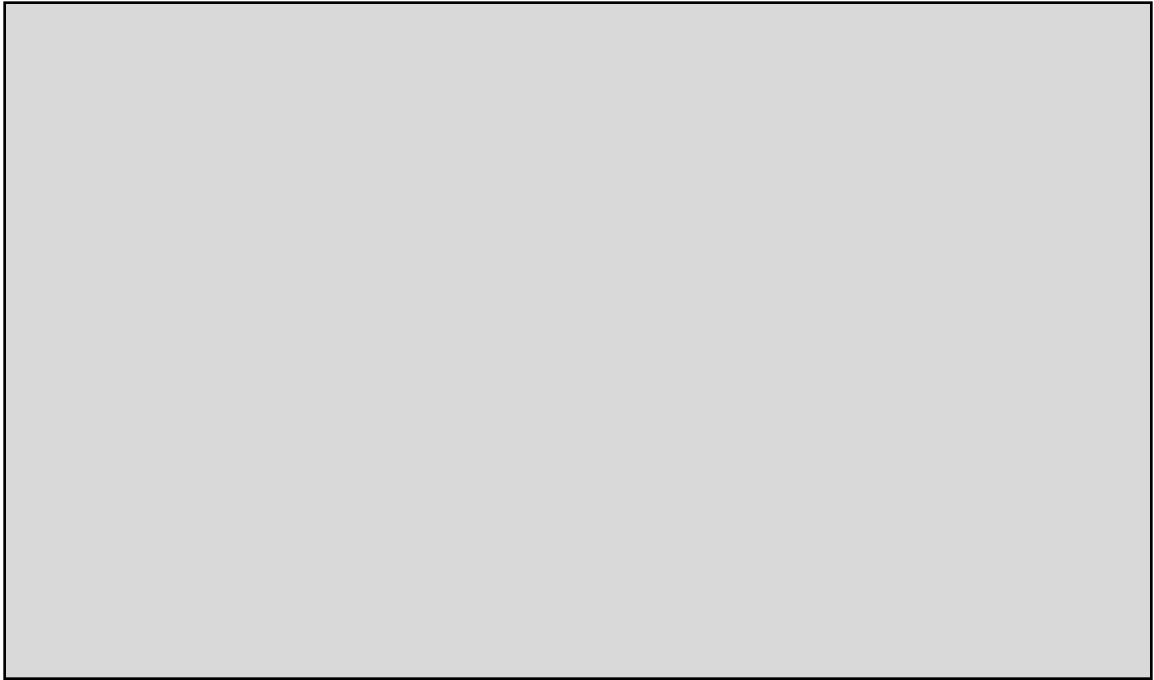

Figure S10:  $^{13}\text{C}$  NMR spectra of complexes **1** and **2**

Complex **1**:

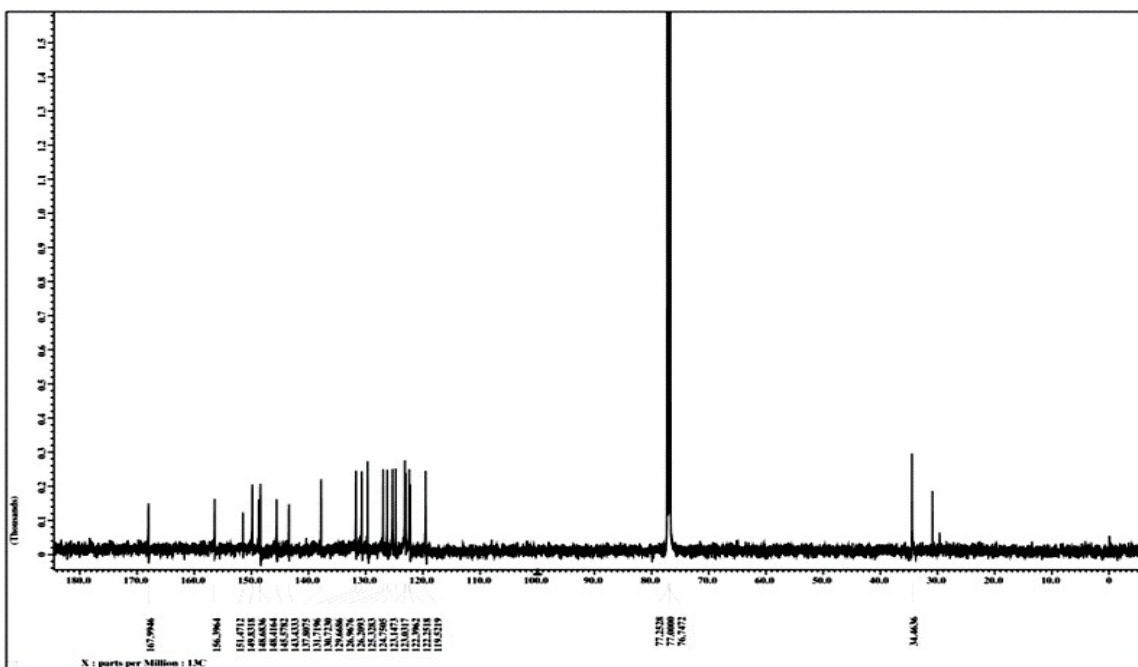

Complex **2**:

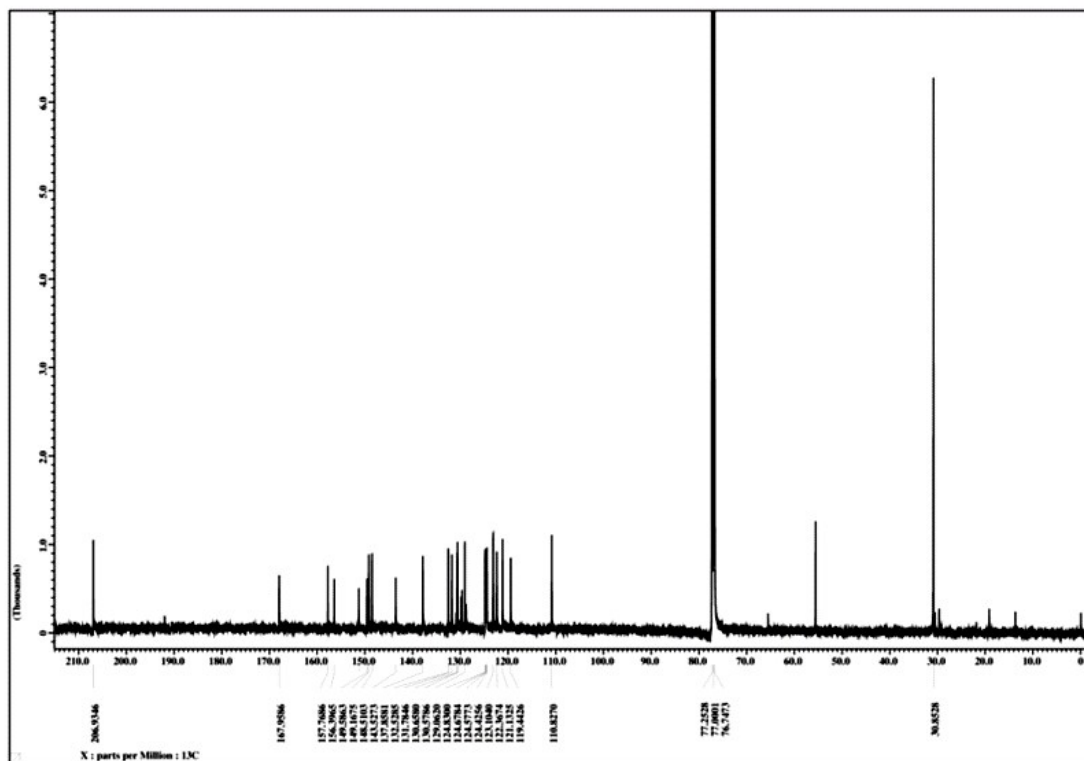

Figure S11: Temperature dependent  $^1\text{H}$  NMR of **1** and **2** in Methanol- $d_4$

Complex 1:

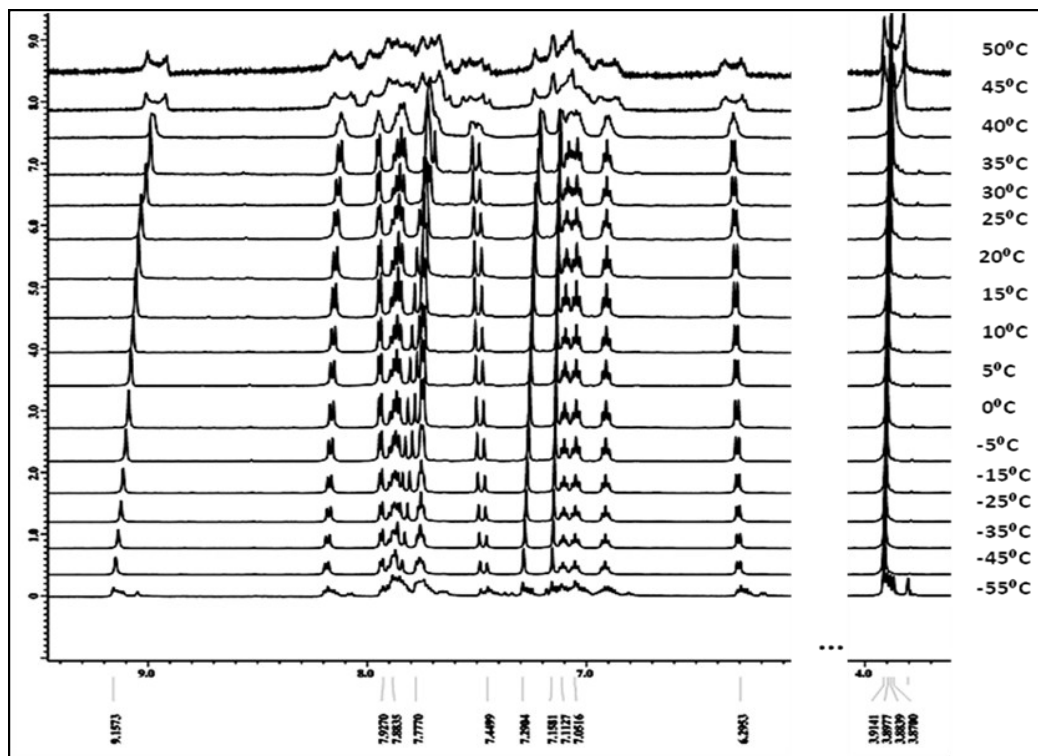

Complex 2:

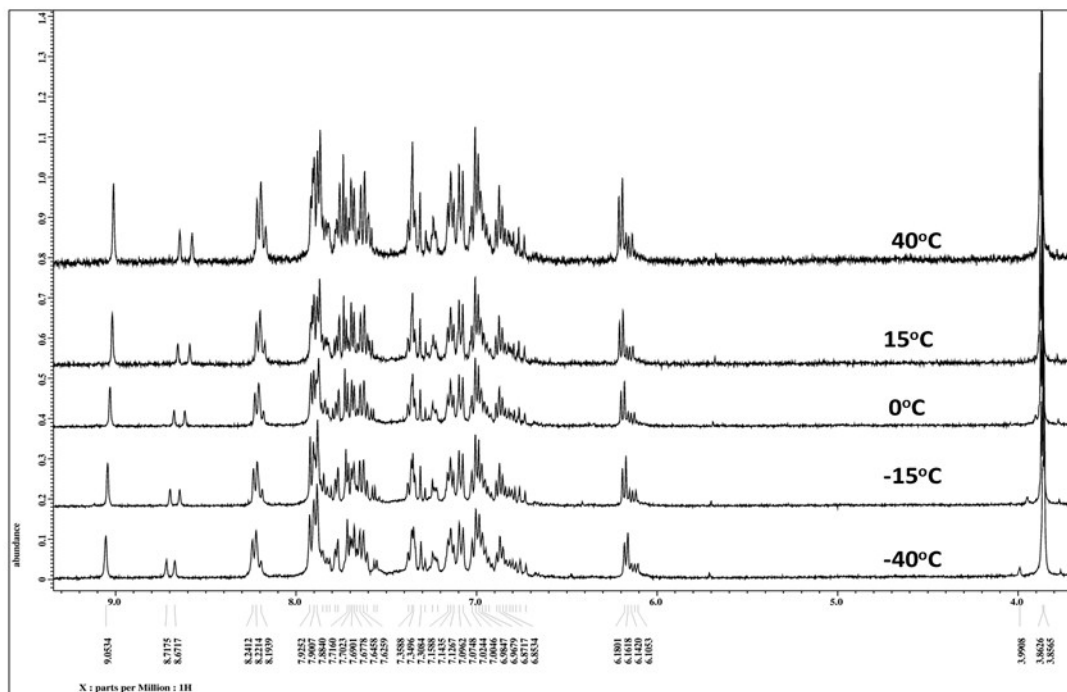



**Figure S12:** Time dependent electronic spectra of **2** (10  $\mu\text{M}$  in dry DCM) under 366nm light exposure.

A. Absorption spectra:

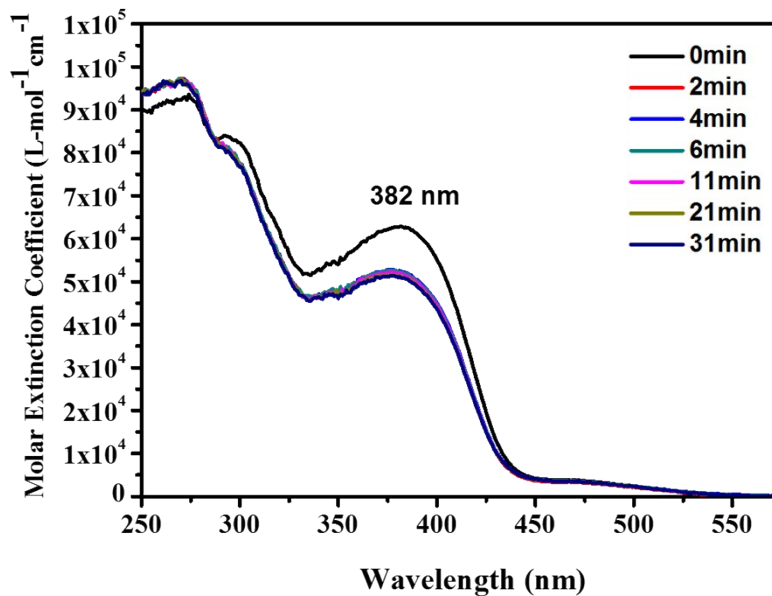

B. Emission spectra ( $\lambda_{\text{ex}} = 350 \text{ nm}$ ):

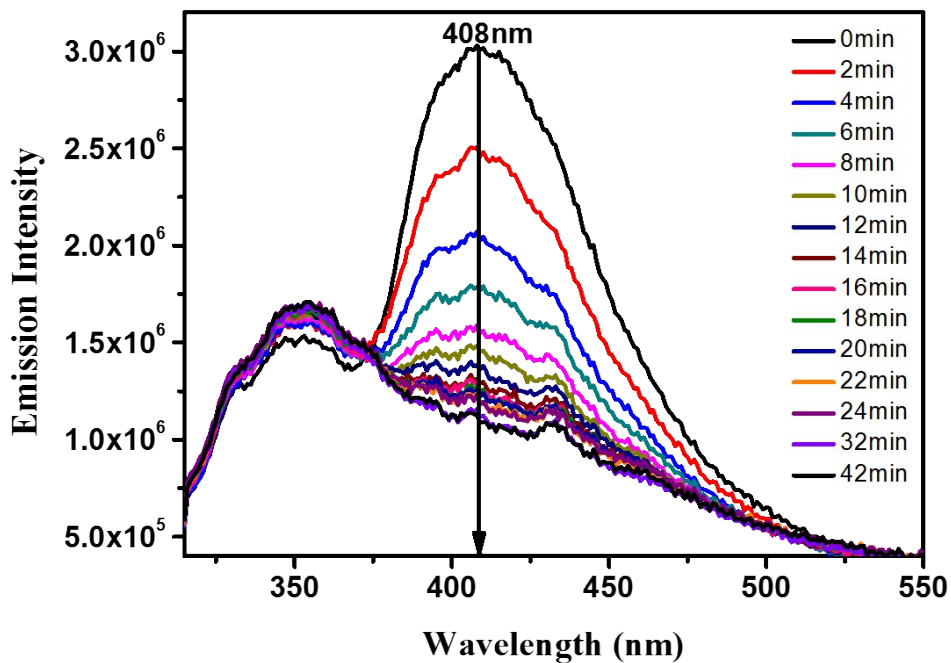

**Figure S13:** Energy levels of the ground and excited state for the ligands **L1**, **L2** and complexes **1**, **2**

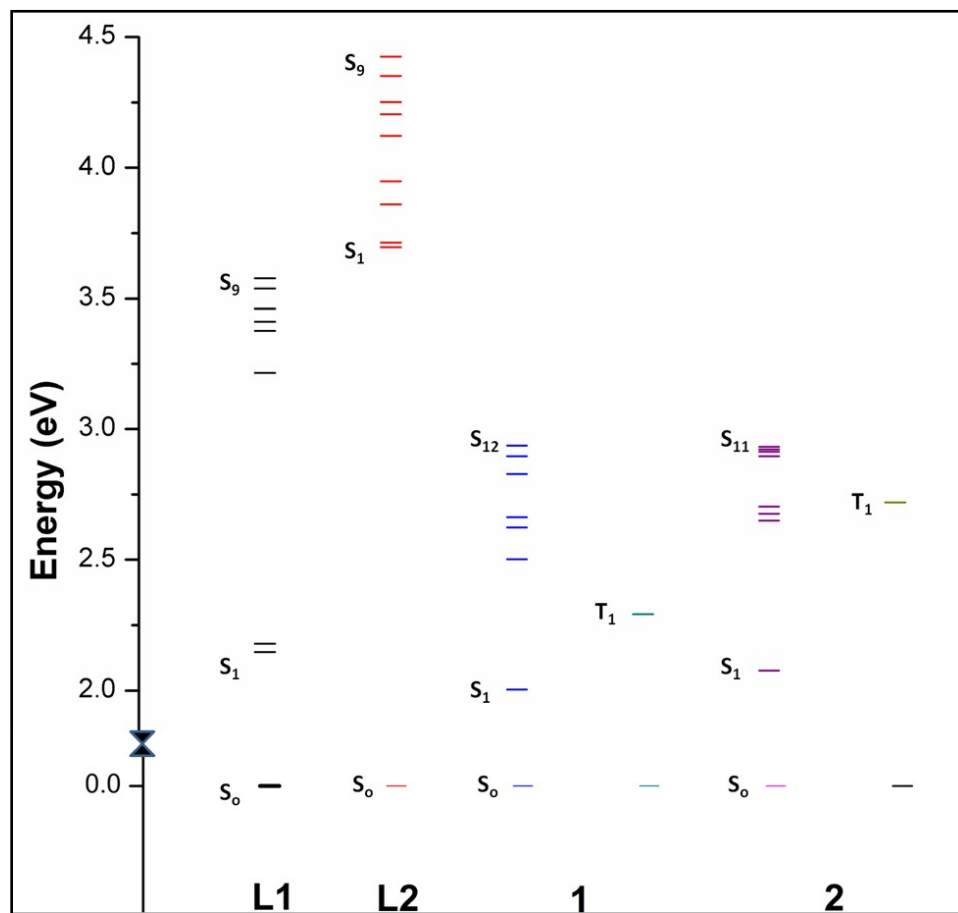

**Figure S14: ESI-MS of ligands L1 and L2**

**L1:**

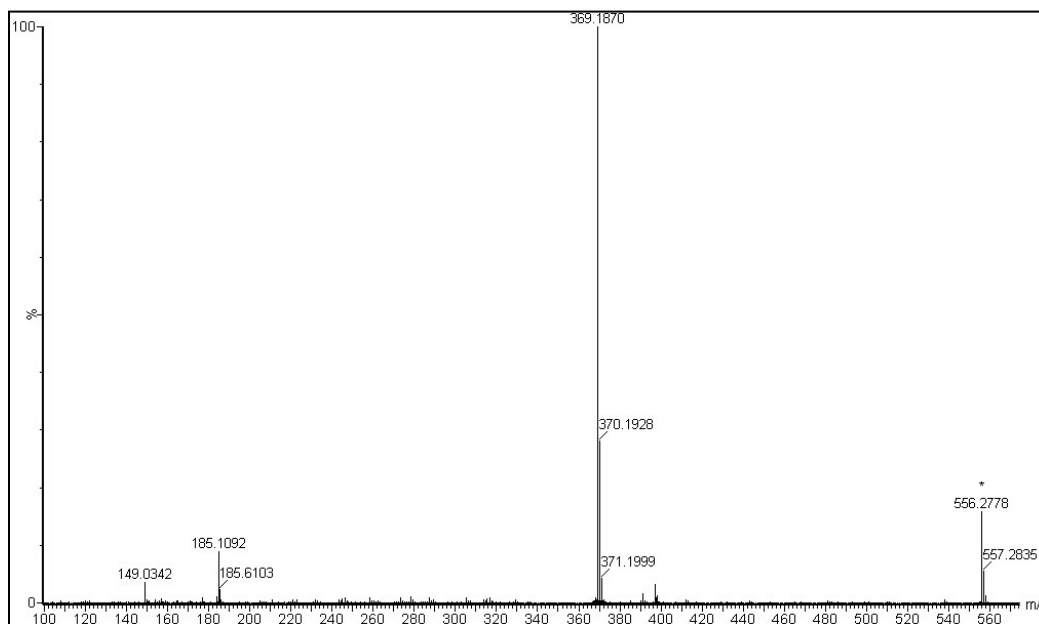

**L2:**

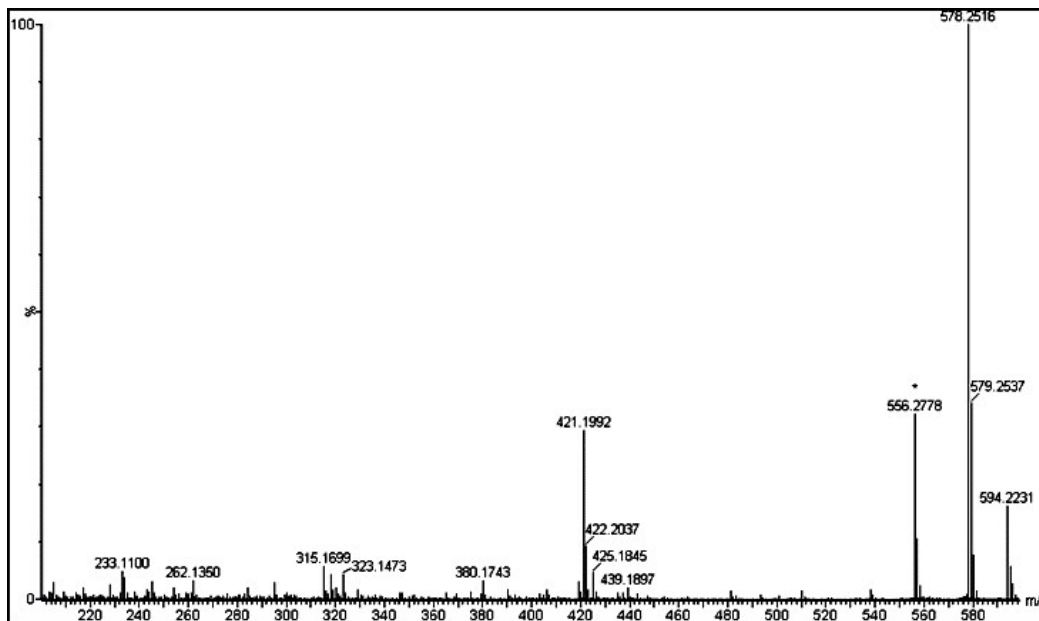

**Figure S15:** ESI-MS of complexes 1 and 2

Complex 1:

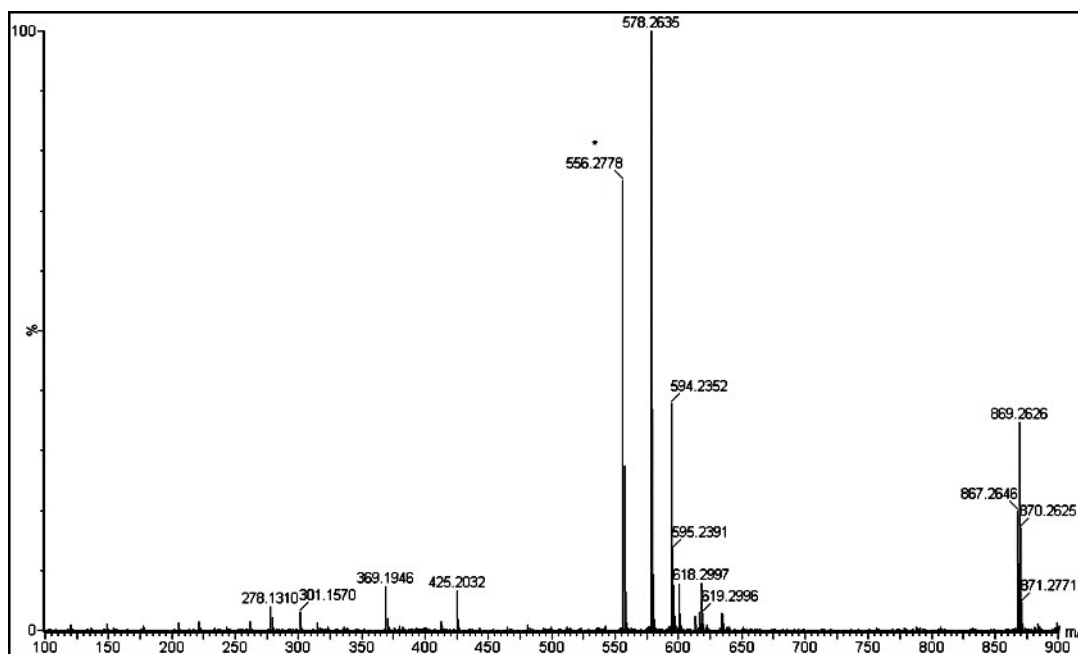

Complex 2.

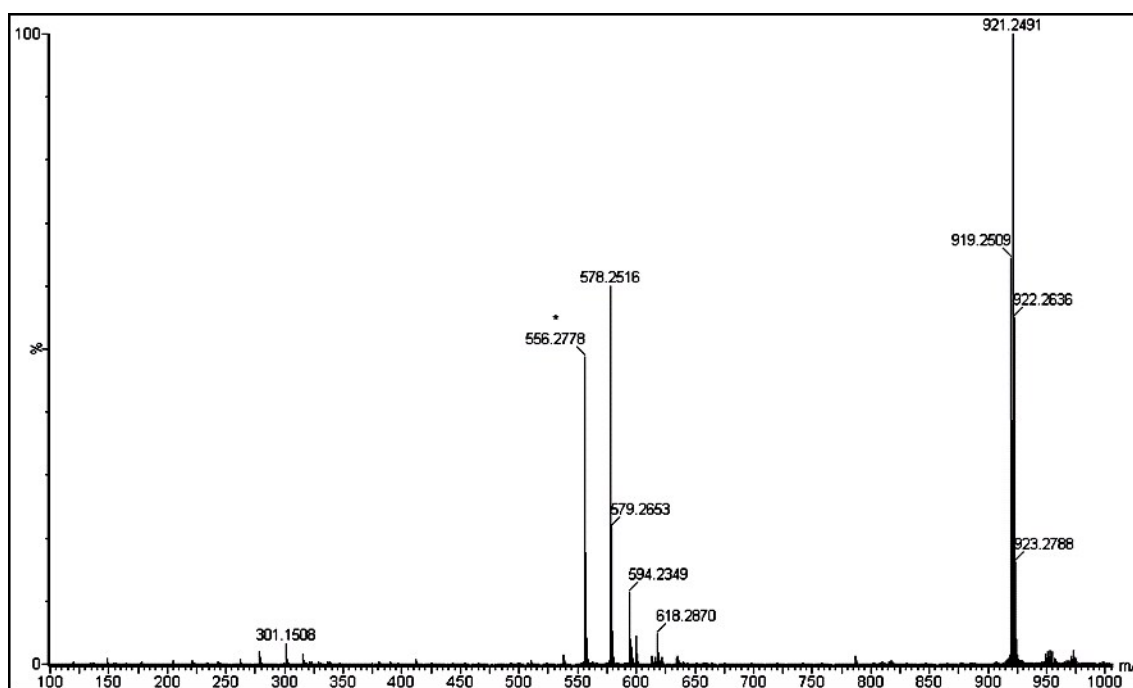

**Table S1:** Selected Bond Distances and Bond Angles for **1**, **2**, and **2<sub>final</sub>**

| Bond lengths(Å)          | Bond angles(°)         | Bond angles(°)           |
|--------------------------|------------------------|--------------------------|
| <b>1</b>                 |                        |                          |
| Ir1 - N1 2.030(10)       | N1 - Ir1 - N2 172.9(4) | N2 - Ir1 - C22 80.4(4)   |
| Ir1 - N2 2.052(9)        | N1 - Ir1 - N3 90.8(4)  | N3 - Ir1 - N4 76.0(4)    |
| Ir1 - N3 2.148(9)        | N1 - Ir1 - N4 96.0(4)  | N3 - Ir1 - C11 97.8(4)   |
| Ir1 - N4 2.143(9)        | N1 - Ir1 - C11 81.1(4) | N3 - Ir1 - C22 174.3(4)  |
| Ir1 - C11 2.005(10)      | N1 - Ir1 - C22 93.7(4) | N4 - Ir1 - C11 173.3(4)  |
| Ir1 - C22 1.995(11)      | N2 - Ir1 - N3 95.5(4)  | N4 - Ir1 - C22 99.8(4)   |
|                          | N2 - Ir1 - N4 88.9(3)  | C11 - Ir1 - C22 86.5(4)  |
|                          | N2 - Ir1 - C11 94.6(4) |                          |
| <b>2</b>                 |                        |                          |
| Ir1 - N1 2.04(2)         | N1 - Ir1 - N2 174.6(9) | N2 - Ir1 - C12 80.6(9)   |
| Ir1 - N2 2.06(2)         | N1 - Ir1 - N3 89.1(9)  | N3 - Ir1 - N4 75.7(10)   |
| Ir1 - N3 2.15(2)         | N1 - Ir1 - N4 96.2(10) | N3 - Ir1 - C1 97.6(11)   |
| Ir1 - N4 2.11(3)         | N1 - Ir1 - C1 80.1(12) | N3 - Ir1 - C12 172.1(9)  |
| Ir1 - C11 1.96(3)        | N1 - Ir1 - C12 95.5(9) | N4 - Ir1 - C11 172.5(10) |
| Ir1 - C12 2.026(14)      | N2 - Ir1 - N3 95.3(9)  | N4 - Ir1 - C12 97.4(9)   |
|                          | N2 - Ir1 - N4 88.0(9)  | C1 - Ir1 - C12 89.5(10)  |
|                          | N2 - Ir1 - C1 96.1(11) |                          |
| <b>2<sub>Final</sub></b> |                        |                          |
| Ir1 - N1 1.936(18)       | N1 - Ir1 - N2 173.6(7) | N2 - Ir1 - C22 81.8(8)   |
| Ir1 - N2 2.014(19)       | N1 - Ir1 - N3 96.6(7)  | N3 - Ir1 - N4 75.9(7)    |
| Ir1 - N3 2.132(18)       | N1 - Ir1 - N4 89.6(7)  | N3 - Ir1 - C11 175.5(8)  |
| Ir1 - N4 2.127(17)       | N1 - Ir1 - C11 82.5(9) | N3 - Ir1 - C22 99.9(8)   |
| Ir1 - C11 2.00(2)        | N1 - Ir1 - C22 92.7(8) | N4 - Ir1 - C11 199.7(8)  |
| Ir1 - C22 2.04(2)        | N2 - Ir1 - N3 87.6(7)  | N4 - Ir1 - C22 175.4(8)  |
|                          | N2 - Ir1 - N4 96.1(7)  | C11 - Ir1 - C22 84.5(9)  |
|                          | N2 - Ir1 - C11 93.7(8) |                          |
