# Supplementary figures and images for: Cyclometalated iridium(iii) complexes of (aryl)ethenyl functionalized 2,2′-bipyridine: synthesis, photophysical properties and trans–cis isomerization behavior
Source: Royal Society of Chemistry journal article supplement (doi:10.1039/c5ra16214a), 2015-01-01

## Supporting Information 2

### $^1\text{H}$ NMR of complex 1, after the photophysical experiments

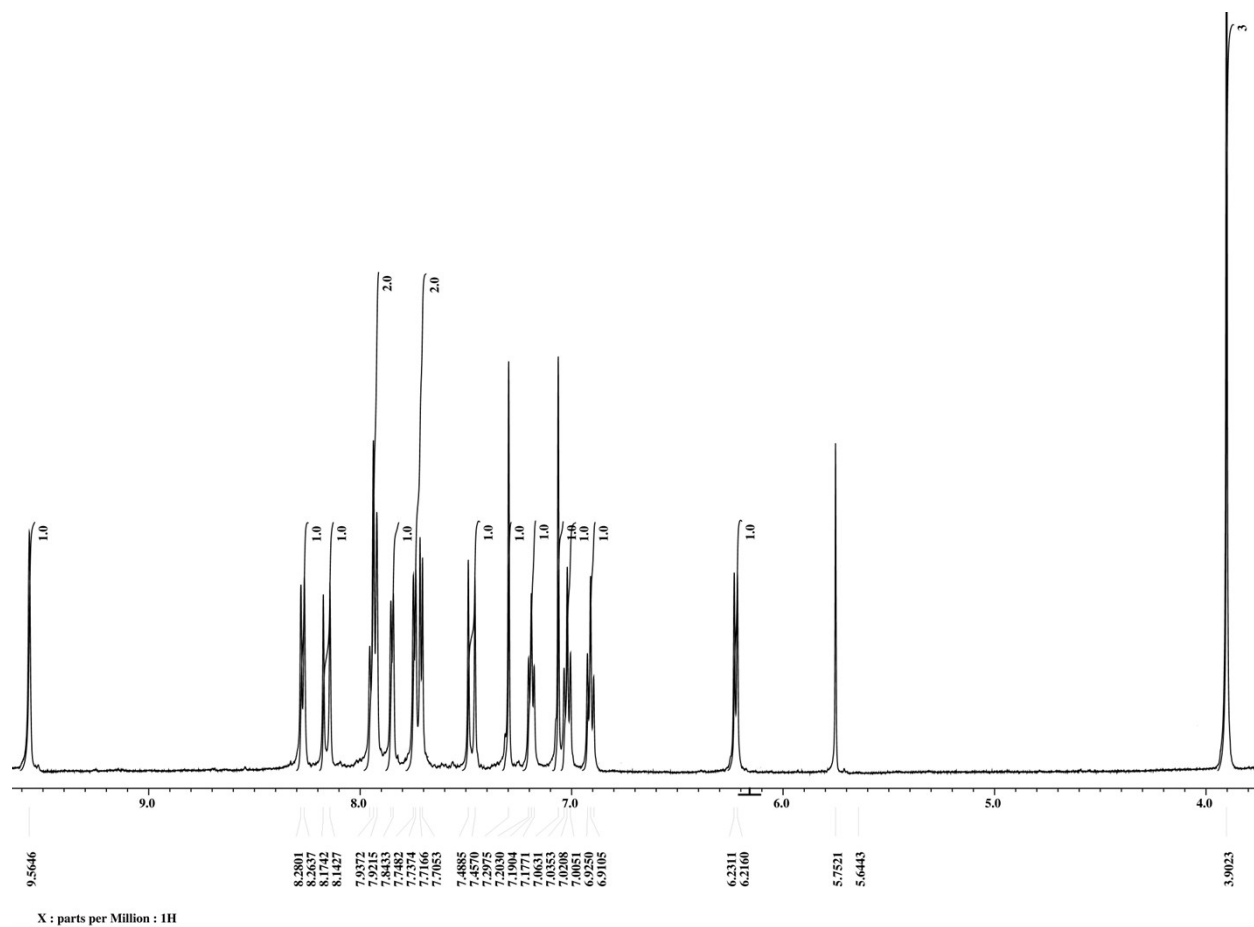

Supplement: c5ra16214a1.pdf [file c5ra16214a1.pdf]
